# Supplementary material for: Catalyst-free and multicomponent synthesis of 3-aminoalkylated indolesviaa Mannich-type reaction: multitargeted anticancer, tyrosinase and α-glucosidase inhibitory activities
Source: Royal Society of Chemistry journal article supplement (doi:10.1039/d1nj02536h), 2021-01-01
Supplement: d1nj02536h1.pdf [file d1nj02536h1.pdf]

## Supporting Information

### Catalyst-free and multicomponent synthesis of 3-aminoalkylated indoles via Mannich-type reaction: multitargeted anticancer, tyrosinase and $\alpha$ -glucosidase inhibitory activities

Thi-Kim-Chi Huynh,<sup>a,b</sup> Kim-Khanh-Huy Ngo,<sup>c</sup> Hoang-Phuc Nguyen,<sup>a,c</sup> Hoai-Khanh Dang,<sup>c</sup>  
Van-Trung Phung,<sup>d</sup> Khac-Minh Thai,<sup>e</sup> Thi-Kim-Dung Hoang<sup>\*a,b</sup>

<sup>a</sup>Institute of Chemical Technology – VAST, 1A Thanh Loc 29 Str., Dist. 12, Ho Chi Minh City, Vietnam

<sup>b</sup>Graduate University of Science and Technology – VAST, 18 Hoang Quoc Viet Str., Cau Giay Dist., Hanoi, Vietnam

<sup>c</sup>Ton Duc Thang University, 19 Nguyen Huu Tho Str., Dist. 7, Ho Chi Minh City, Vietnam

<sup>d</sup>Center for Research and Technology Transfer – VAST, 18 Hoang Quoc Viet Str., Cau Giay Dist., Hanoi, Vietnam

<sup>e</sup>Department of Medicinal Chemistry, Faculty of Pharmacy, University of Medicine and Pharmacy at Ho Chi Minh City – 41-43 Dinh Tien Hoang Str., Dist. 1, Ho Chi Minh City, Vietnam

### 3-(pyrrolidin-1-ylmethyl)-1H-indole-2-carboxylic acid (**4a**)

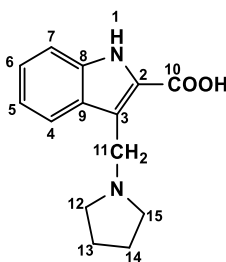

#### <sup>1</sup>H-NMR:

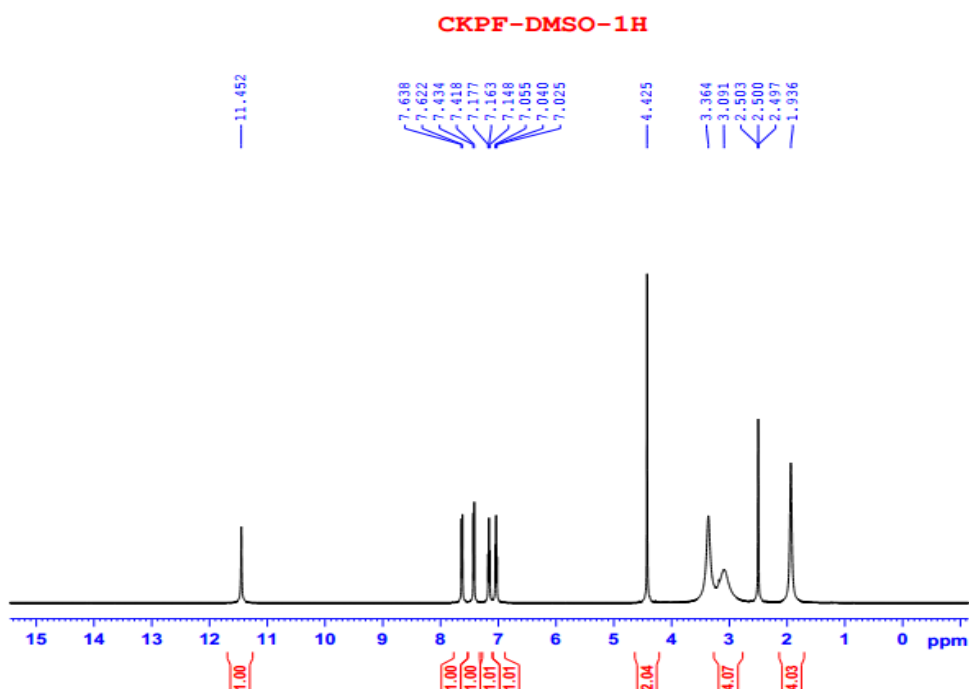

<sup>13</sup>C-NMR:

**CKPF-DMSO-C13CPD**

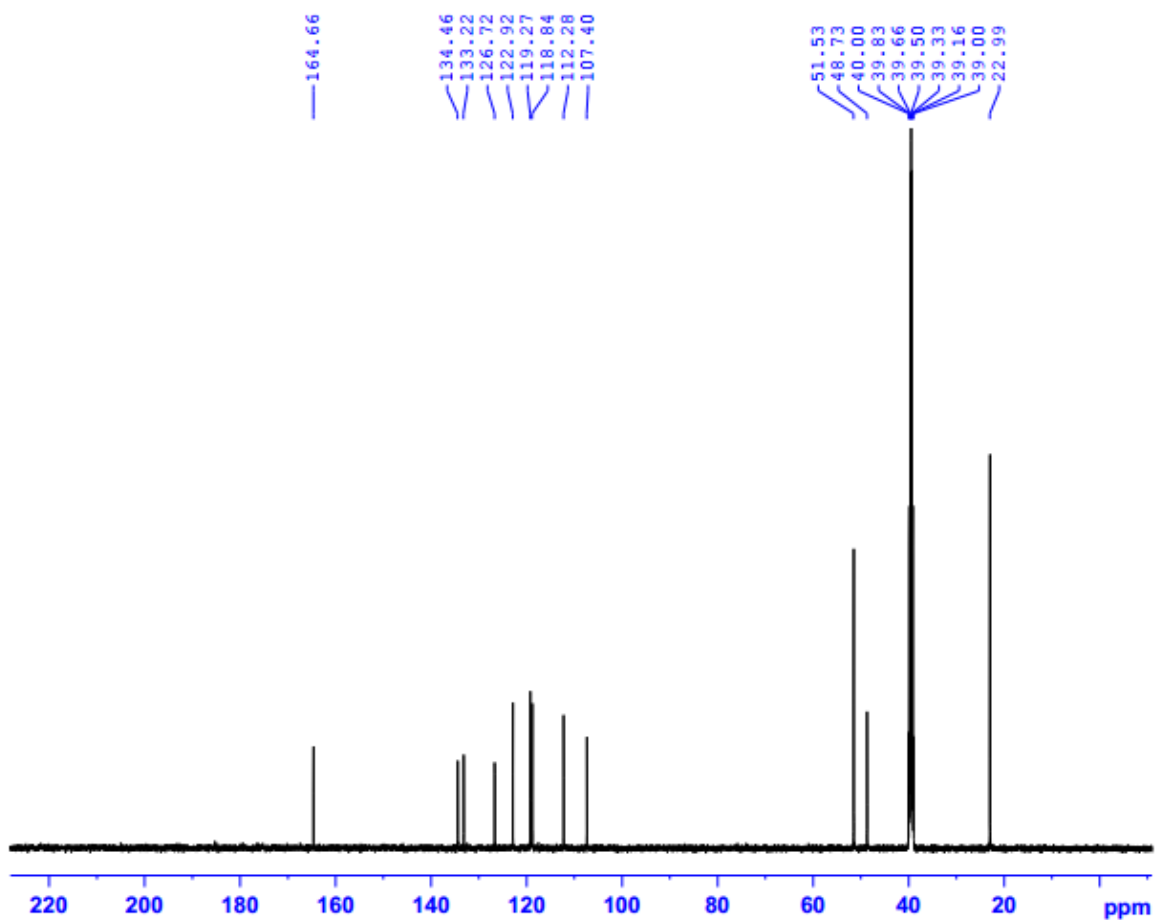

# ESI-HRMS:

## ANALYSIS REPORT

### Injection details

|                         |                       |                           |              |
|-------------------------|-----------------------|---------------------------|--------------|
| <i>Sample name</i>      | CKPF                  | <i>Vial position</i>      | 1            |
| <i>Sample file name</i> | SER_wiff2 - CHI       | <i>Inject volume</i>      | 5.00         |
| <i>Acquisition date</i> | 30/11/2018 1:04:54 PM | <i>Acquisition method</i> | ESI_NEG_SCAN |
| <i>Operator</i>         | CB21261708            | <i>Instrument name</i>    | X500R_QTOF   |

### Full mass spectrum

Spectrum from CKPF-ESI.wiff2 (sample 1) - CKPF-ESI, -TOF MS (75 - 1500) from 0.162 min, noise filtered (noise multiplier = 1.5), Gaussian smoothed (0.5 points)

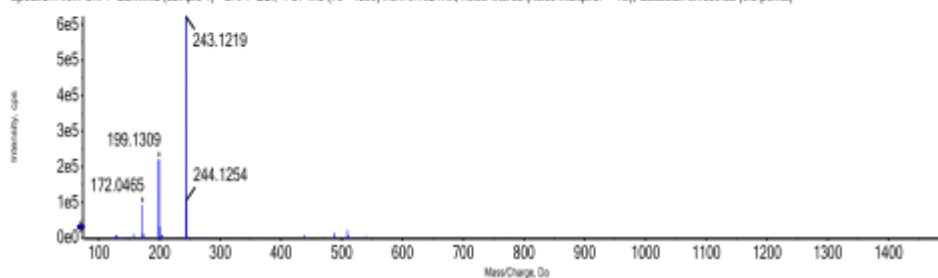

### Expanded spectrum

Spectrum from CKPF-ESI.wiff2 (sample 1) - CKPF-ESI, -TOF MS (75 - 1500) from 0.162 min, noise filtered (noise multiplier = 1.5), Gaussian smoothed (0.5 points)

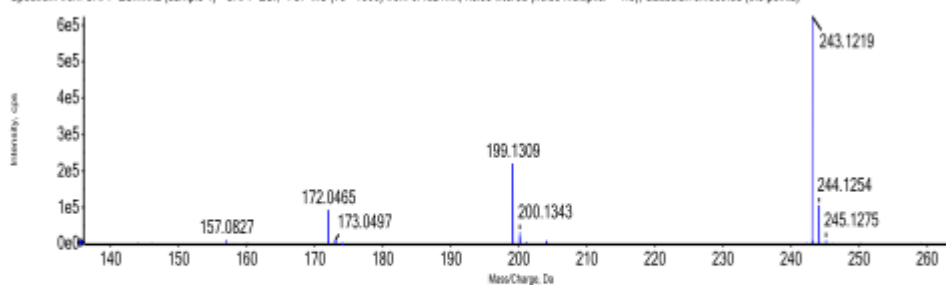

### Molecular formula prediction

3-(morpholinomethyl)-1H-indole-2-carboxylic acid (**4b**)

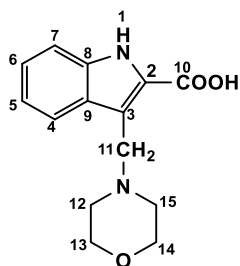

<sup>1</sup>H-NMR:

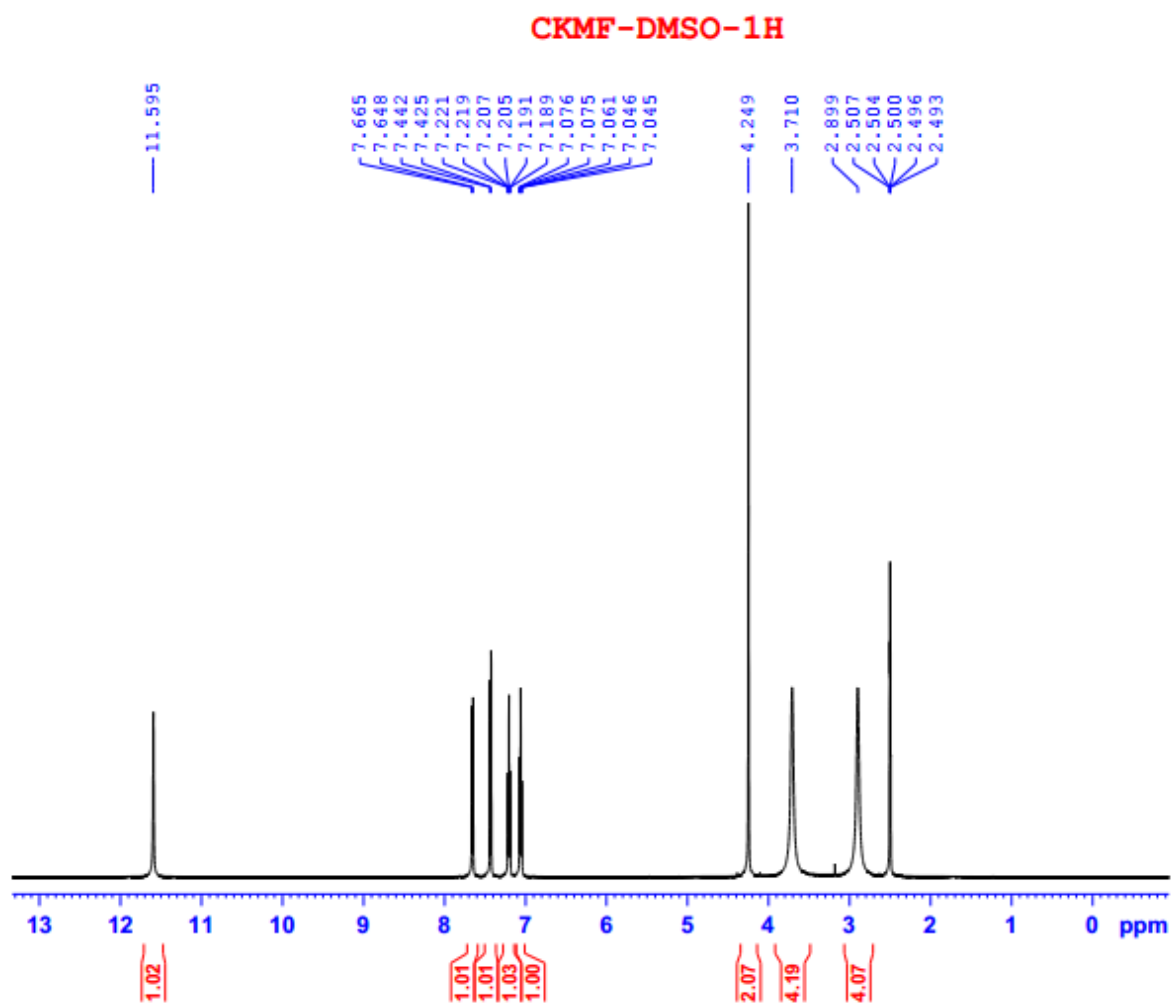

<sup>13</sup>C-NMR:

CKMF-DMSO-C13CPD

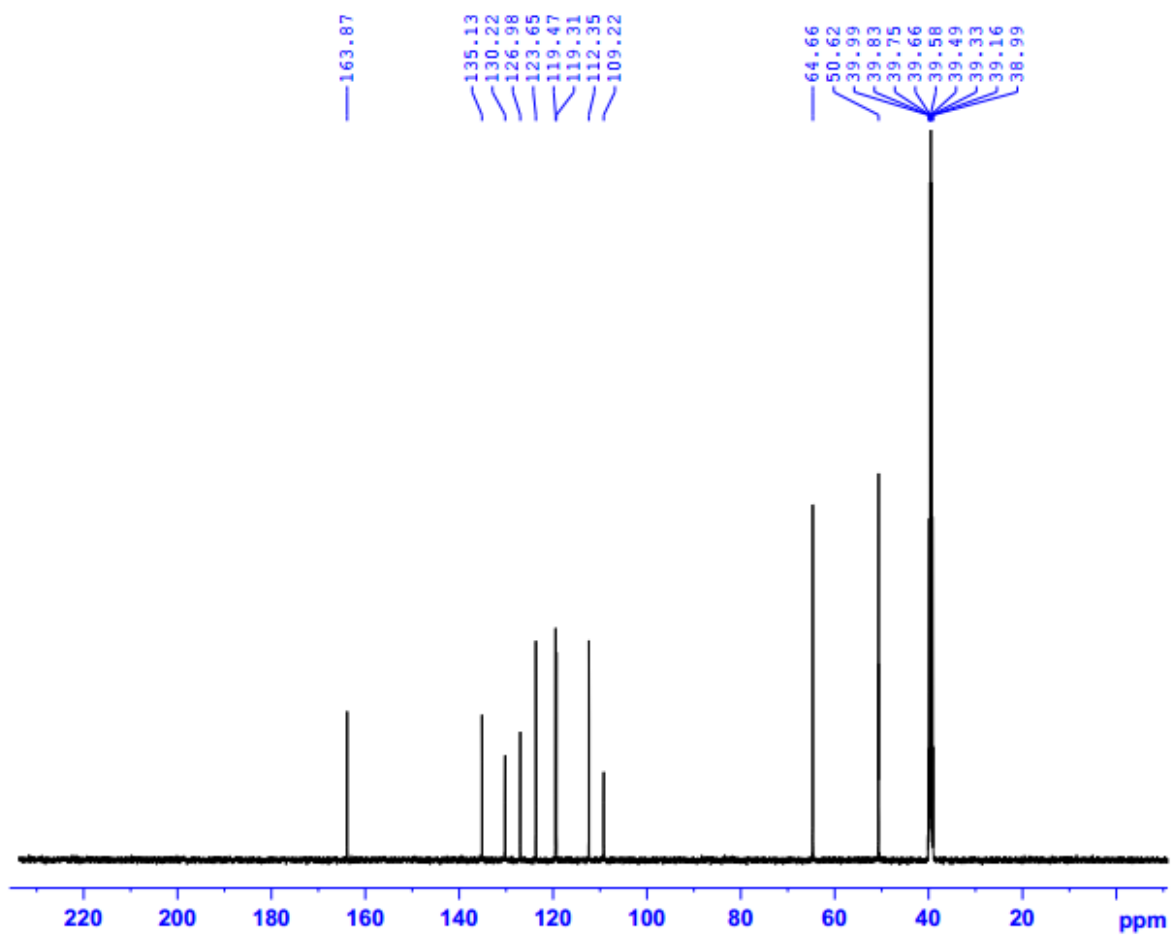

# ESI-HRMS:

## ANALYSIS REPORT

### Injection details

|                  |                     |                    |              |
|------------------|---------------------|--------------------|--------------|
| Sample name      | CKMF                | Vial position      | 11           |
| Sample file name | SER. wiff2 - CHI    | Inject volume      | 5.00         |
| Acquisition date | 8/1/2019 1:04:54 PM | Acquisition method | ESI_NEG_SCAN |
| Operator         | CB21261708          | Instrument name    | X500R_QTOF   |

### Full mass spectrum

Spectrum from P49-CH1.wiff2 (sample 2) - CKMF-ESI-P49, -TOF MS (70 - 1500) from 0.167 min, noise filtered (noise multiplier = 1.5), Gaussian smoothed (0.5 points)

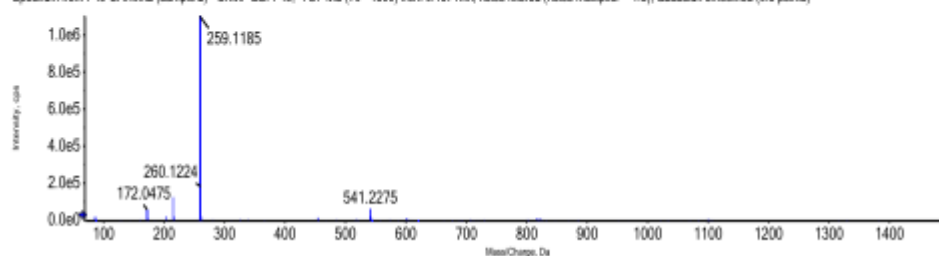

### Expanded spectrum

Spectrum from P49-CH1.wiff2 (sample 2) - CKMF-ESI-P49, -TOF MS (70 - 1500) from 0.167 min, noise filtered (noise multiplier = 1.5), Gaussian smoothed (0.5 points)

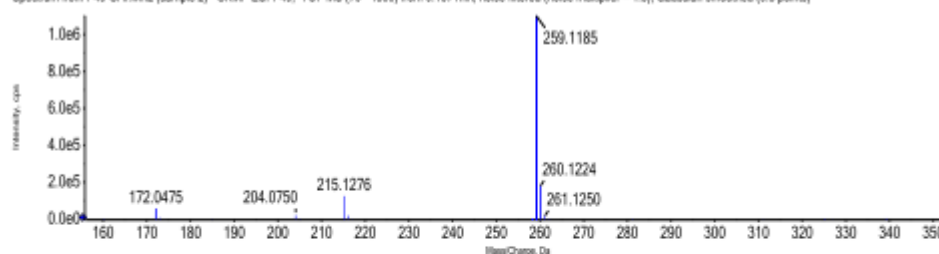

### Molecular formula prediction

3-((4-methylpiperazin-1-yl)methyl)-1H-indole-2-carboxylic acid (**4c**)

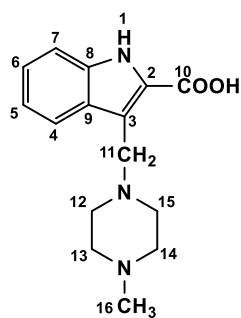

<sup>1</sup>H-NMR:

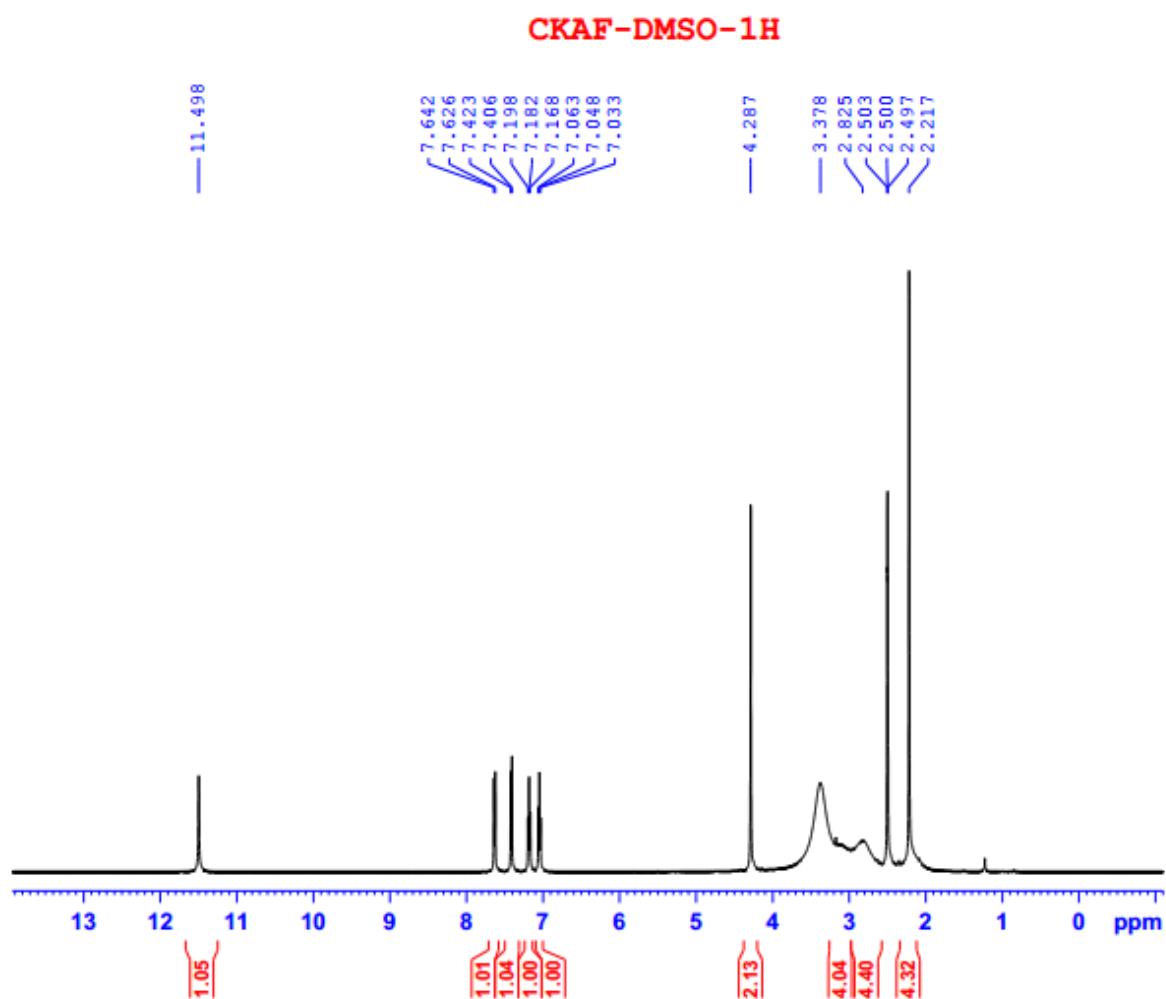

<sup>13</sup>C-NMR:

**CKAF-DMSO-C13CPD**

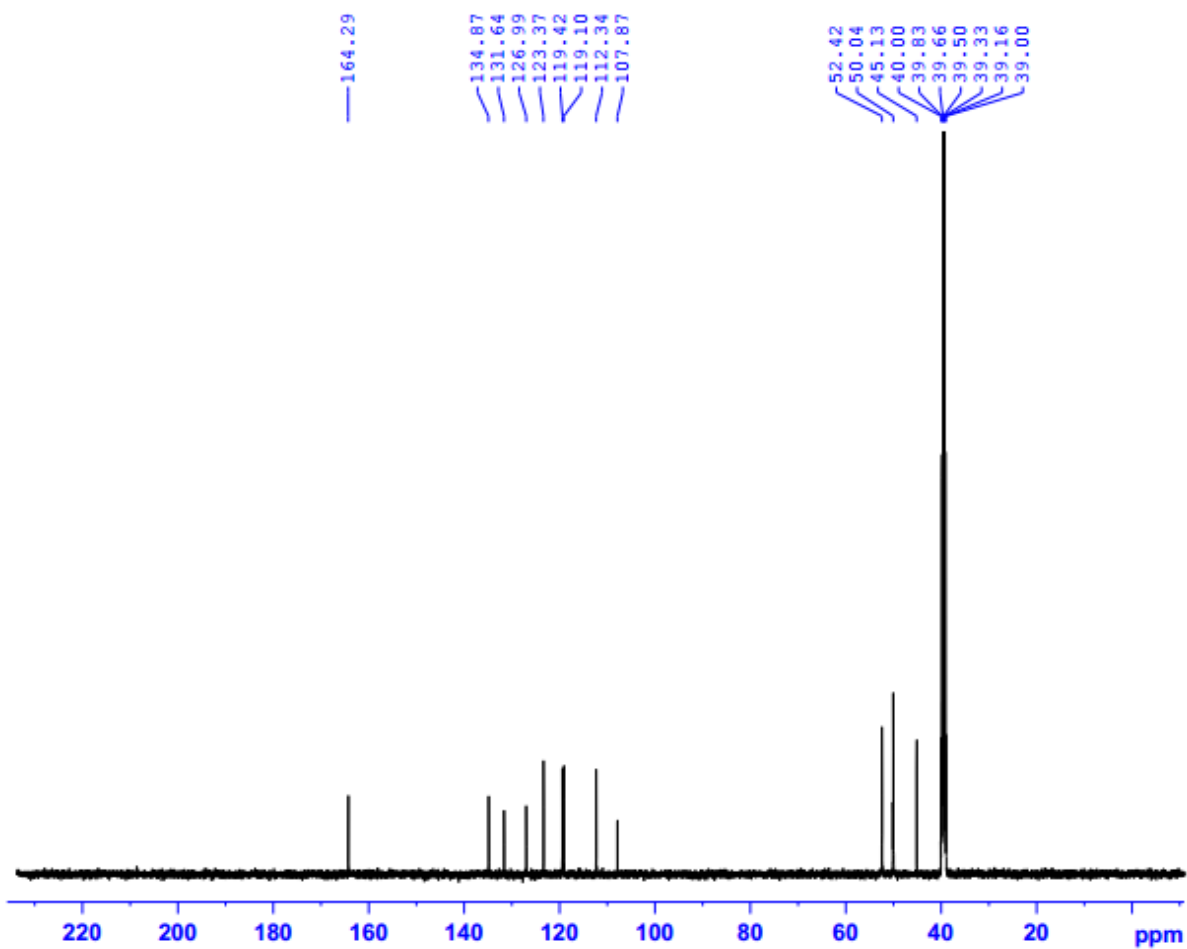



## ESI-HRMS:

### ANALYSIS REPORT

#### Injection details

|                  |                     |                    |              |
|------------------|---------------------|--------------------|--------------|
| Sample name      | CKAF                | Vial position      | 13           |
| Sample file name | SER_wiff2 - CHI     | Inject volume      | 5.00         |
| Acquisition date | 8/1/2019 1:04:54 PM | Acquisition method | ESI_NEG_SCAN |
| Operator         | CB21261708          | Instrument name    | X500R QTOF   |

#### Full mass spectrum

Spectrum from P49-CHI.wiff2 (sample 4) - CKAF-ESI-P49, -TOF MS (70 - 1500) from 0.162 min, noise filtered (noise multiplier = 1.5), Gaussian smoothed (0.5 points)

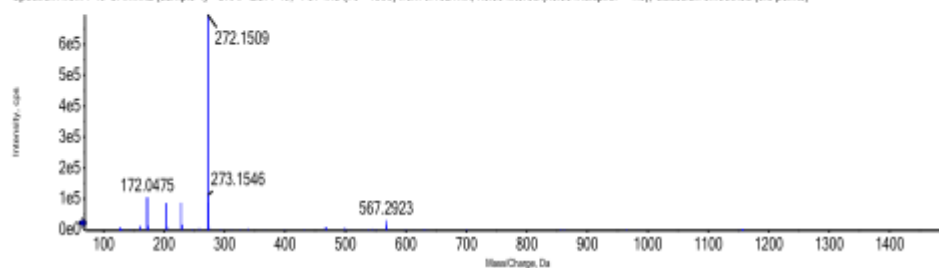

#### Expanded spectrum

Spectrum from P49-CHI.wiff2 (sample 4) - CKAF-ESI-P49, -TOF MS (70 - 1500) from 0.162 min, noise filtered (noise multiplier = 1.5), Gaussian smoothed (0.5 points)

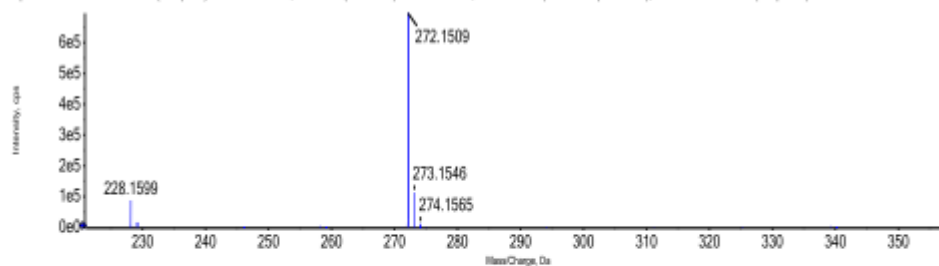

#### Molecular formula prediction

3-(piperidin-1-ylmethyl)-1H-indole-2-carboxylic acid (**4d**)

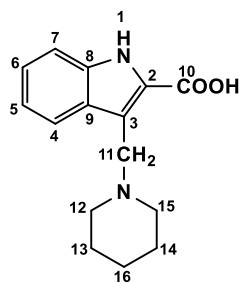

<sup>1</sup>H-NMR:

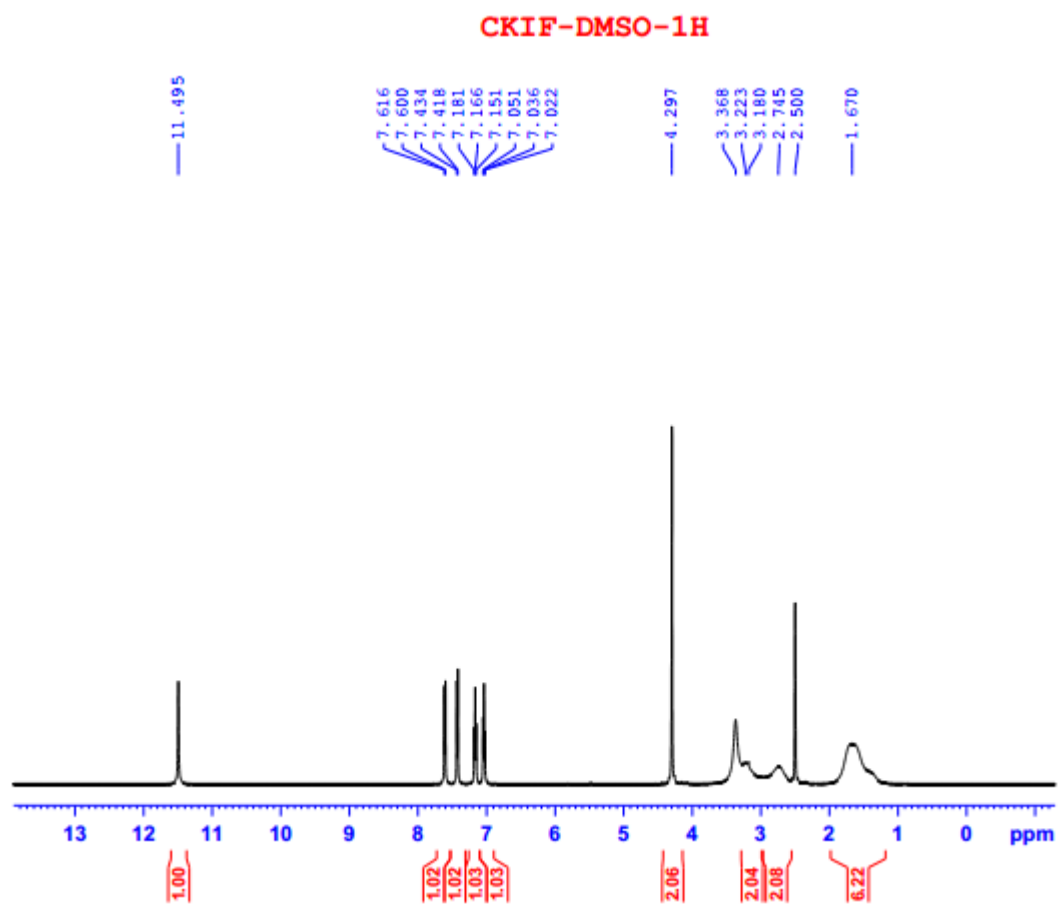

<sup>13</sup>C-NMR:

CKIF-DMSO-C13CPD

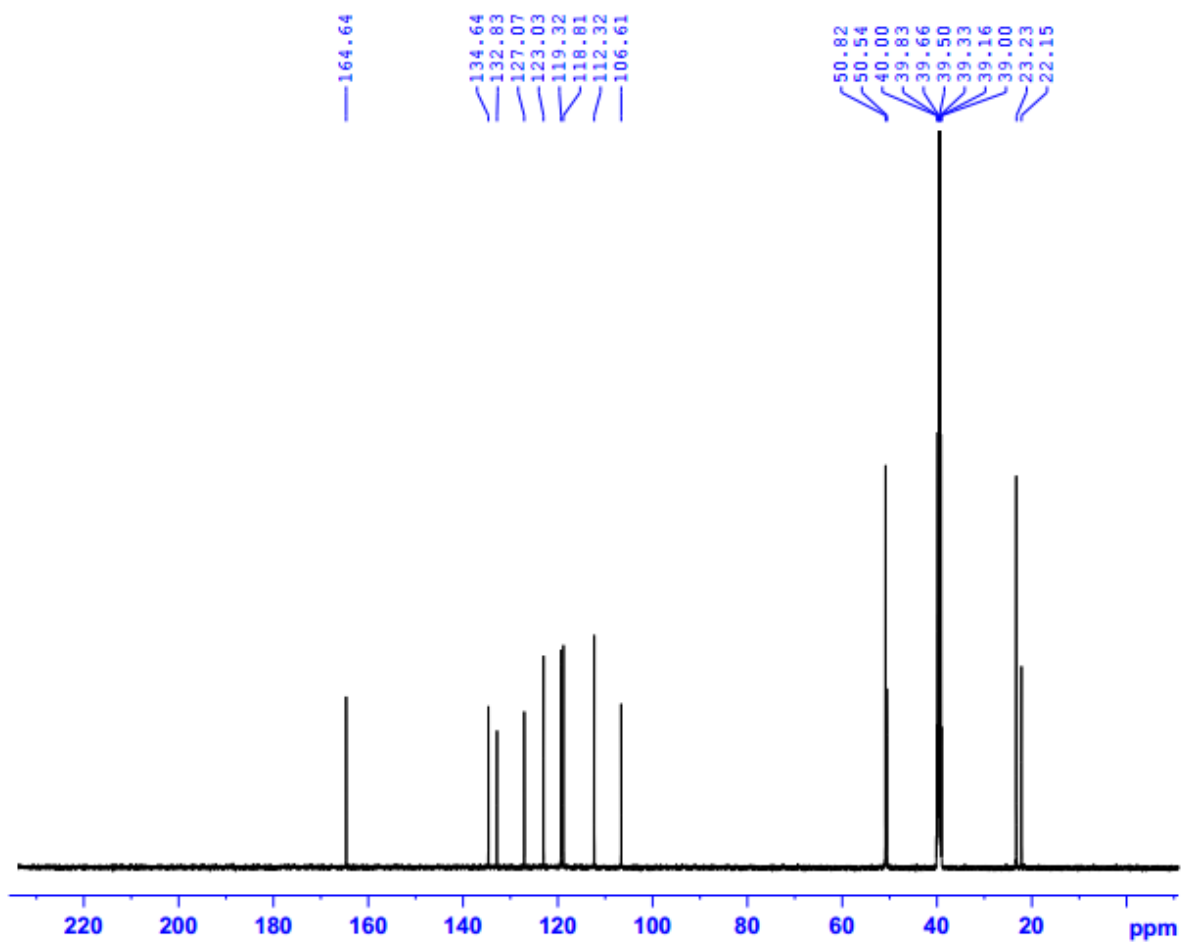

# ESI-HRMS:

## ANALYSIS REPORT

### Injection details

|                         |                     |                           |              |
|-------------------------|---------------------|---------------------------|--------------|
| <i>Sample name</i>      | CKIF                | <i>Vial position</i>      | 10           |
| <i>Sample file name</i> | SER. wiff2 - CHI    | <i>Inject volume</i>      | 5.00         |
| <i>Acquisition date</i> | 8/1/2019 1:04:54 PM | <i>Acquisition method</i> | ESI_NEG_SCAN |
| <i>Operator</i>         | CB21261708          | <i>Instrument name</i>    | X500R_QTOF   |

### Full mass spectrum

Spectrum from P49-CH1.wiff2 (sample 1) - CKIF-ESI-P49, -TOF MS (70 - 1500) from 0.167 min, noise filtered (noise multiplier = 1.5), Gaussian smoothed (0.5 points)

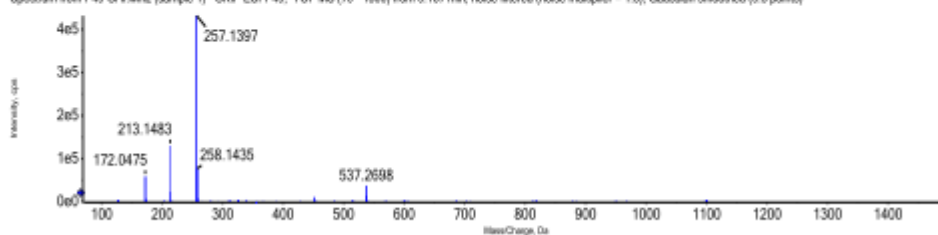

### Expanded spectrum

Spectrum from P49-CH1.wiff2 (sample 1) - CKIF-ESI-P49, -TOF MS (70 - 1500) from 0.167 min, noise filtered (noise multiplier = 1.5), Gaussian smoothed (0.5 points)

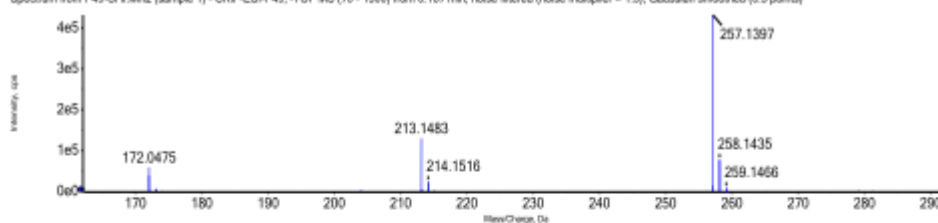

### Molecular formula prediction

2-phenyl-3-(pyrrolidin-1-ylmethyl)-1H-indole (4e)

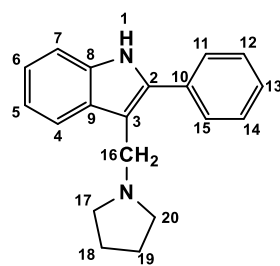

<sup>1</sup>H-NMR:

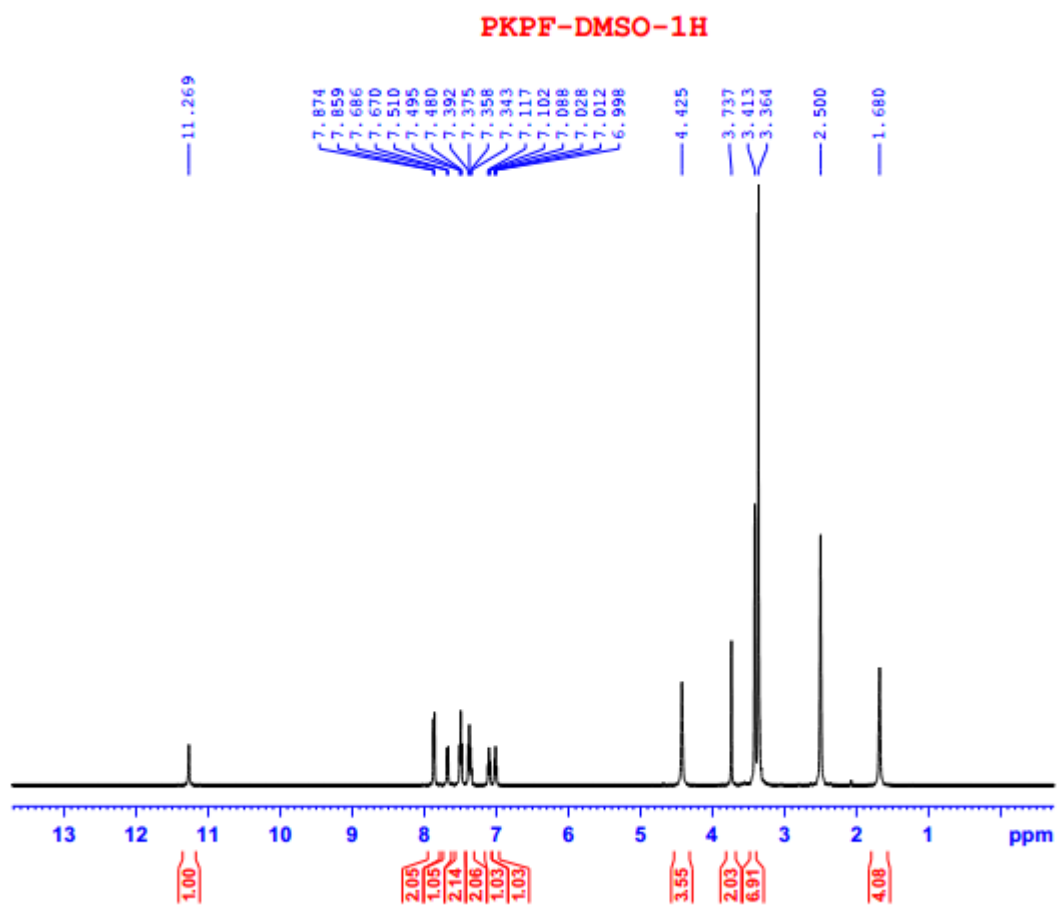

<sup>13</sup>C-NMR:

**PKPF-DMSO-C13CPD**

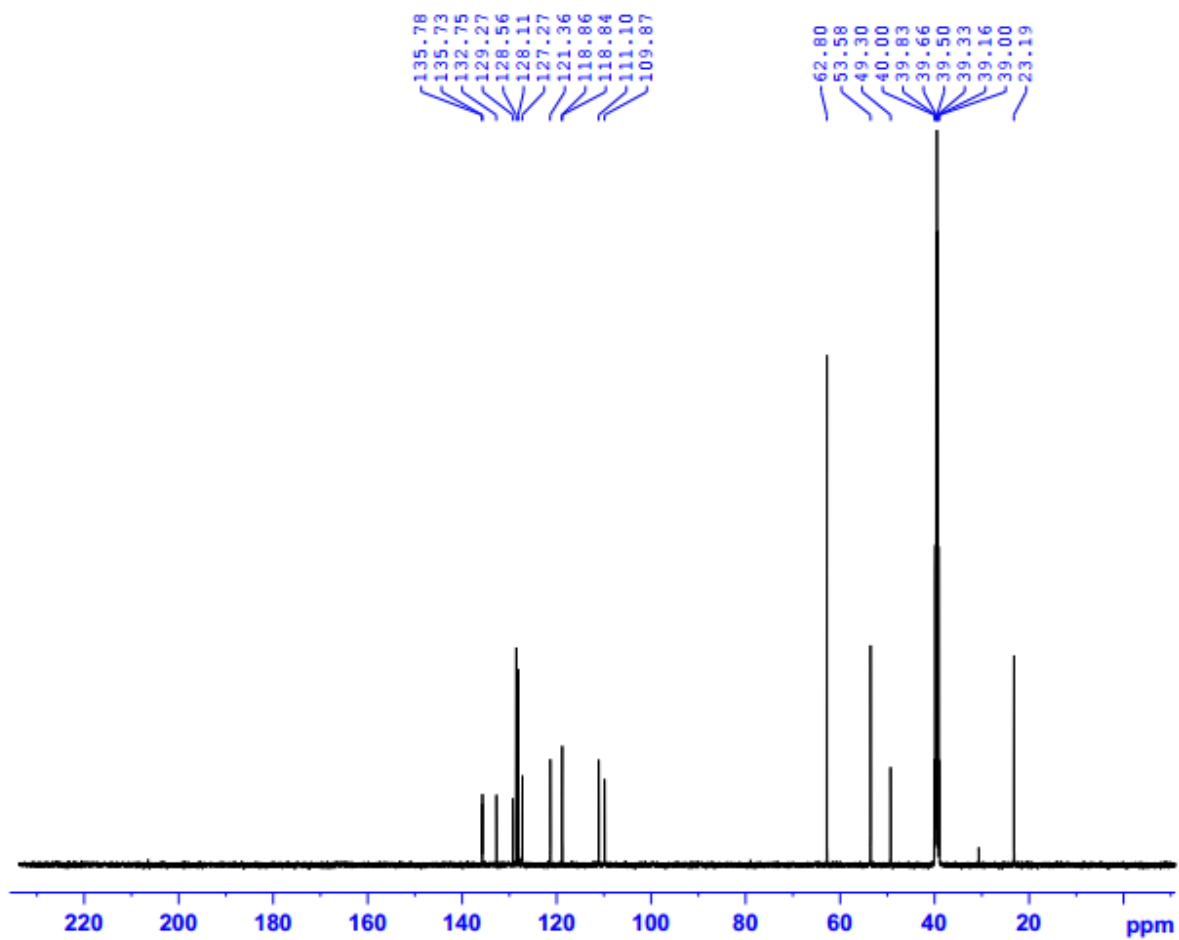

# ESI-HRMS:

## ANALYSIS REPORT

### Injection details

|                  |                       |                    |                        |
|------------------|-----------------------|--------------------|------------------------|
| Sample name      | PKPF                  | Vial position      | 9                      |
| Sample file name | SER. wiff2 - CHI      | Inject volume      | 5.00                   |
| Acquisition date | 30/11/2018 1:04:54 PM | Acquisition method | ESI_NEG_SCAN           |
| Operator         | CB21261708            | Instrument name    | X500 <sub>R</sub> QTOF |

### Full mass spectrum

Spectrum from PKPF-ESI.wiff2 (sample 1) - PKPF-ESI -TOF MS (75 - 1500) from 0.148 min, noise filtered (noise multiplier = 1.5), Gaussian smoothed (0.5 points)

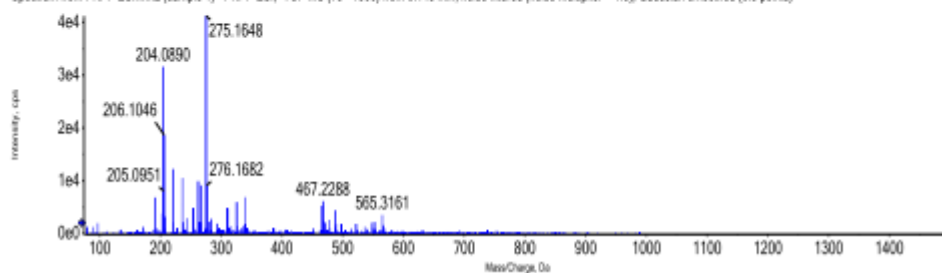

### Expanded spectrum

Spectrum from PKPF-ESI.wiff2 (sample 1) - PKPF-ESI -TOF MS (75 - 1500) from 0.148 min, noise filtered (noise multiplier = 1.5), Gaussian smoothed (0.5 points)

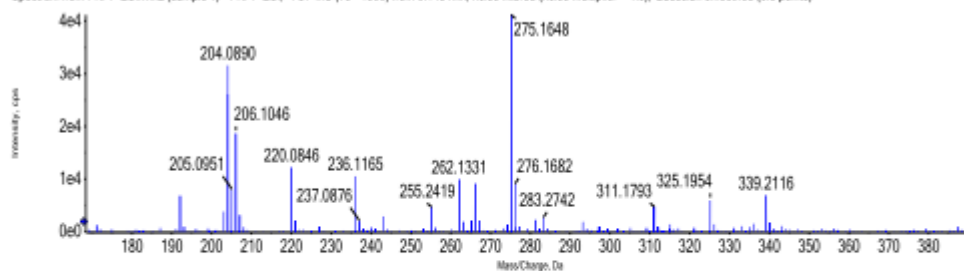

### Molecular formula prediction

4-((2-phenyl-1H-indol-3-yl)methyl)morpholine (**4f**)

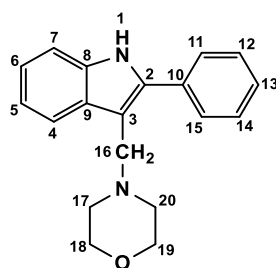

<sup>1</sup>H-NMR:

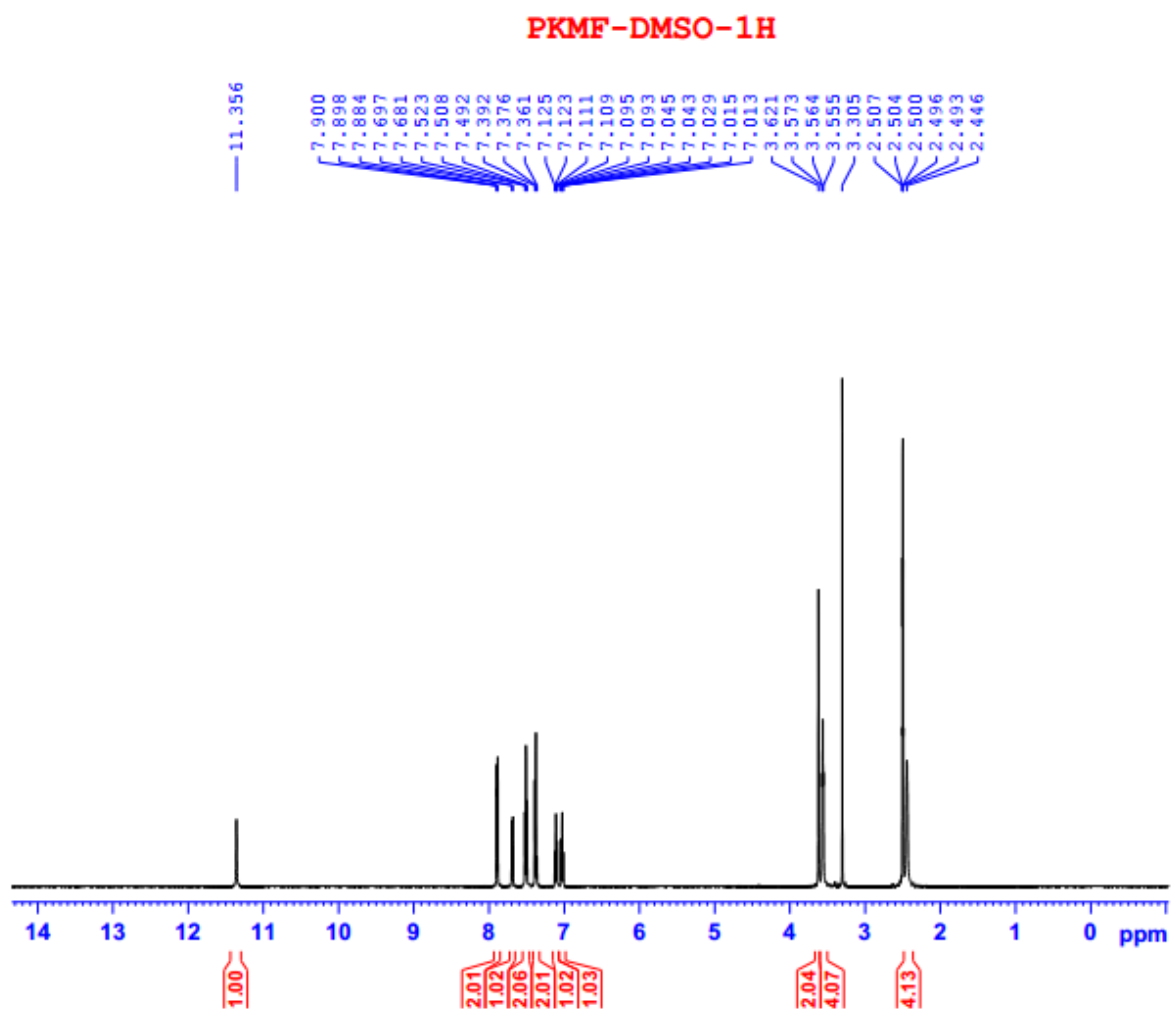



<sup>13</sup>C-NMR:

**PKMF-DMSO-C13CPD**

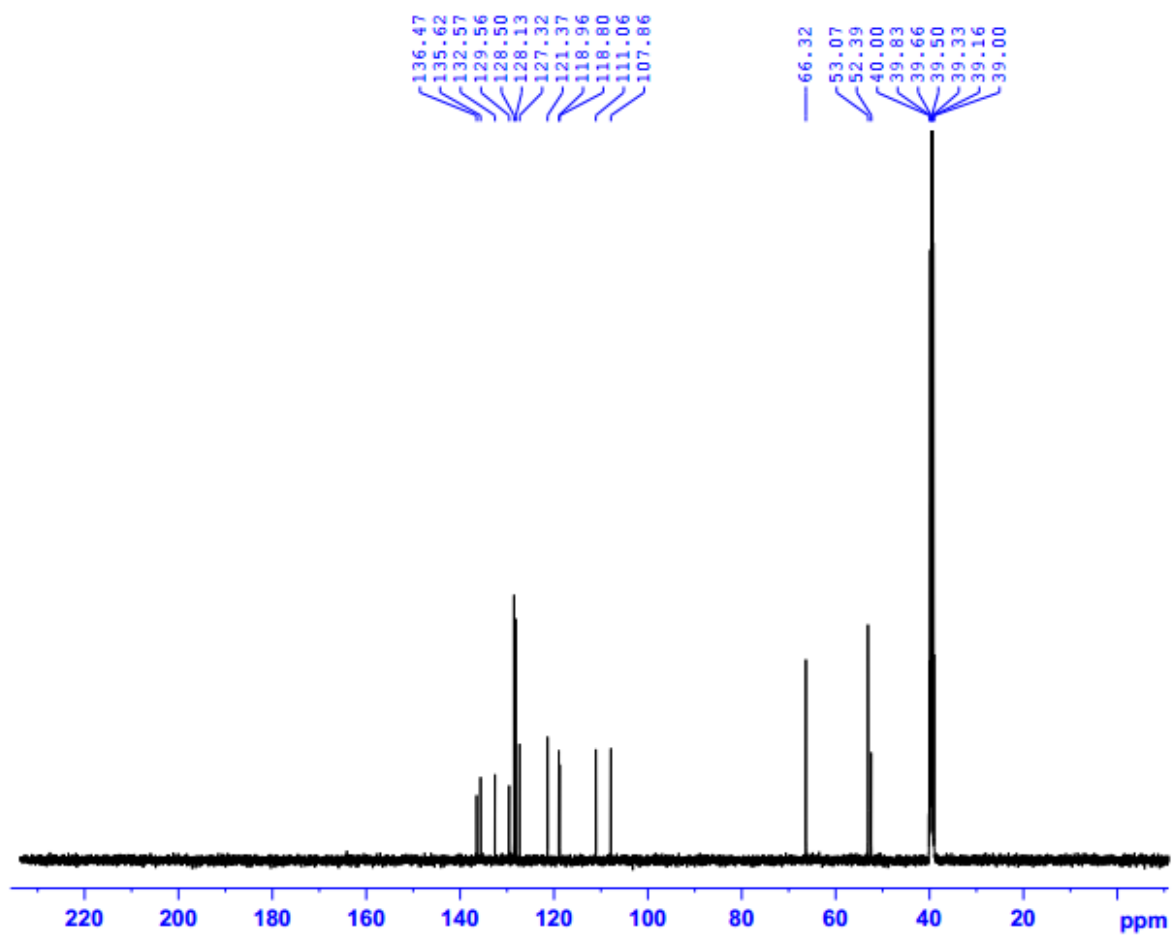

# ESI-HRMS:

## ANALYSIS REPORT

### Injection details

|                  |                     |                    |              |
|------------------|---------------------|--------------------|--------------|
| Sample name      | PKMF                | Vial position      | 19           |
| Sample file name | SER. wiff2 - CHI    | Inject volume      | 5.00         |
| Acquisition date | 8/1/2019 1:04:54 PM | Acquisition method | ESI_NEG_SCAN |
| Operator         | CB21261708          | Instrument name    | X500R.QTOF   |

### Full mass spectrum

Spectrum from P49-CH1.wiff2 (sample 6) - PKMF-ESI-P49, -TOF MS (70 - 1500) from 0.162 min, noise filtered (noise multiplier = 1.5), Gaussian smoothed (0.5 points)

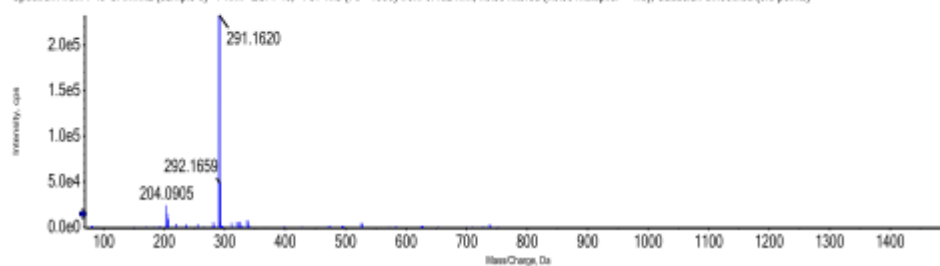

### Expanded spectrum

Spectrum from P49-CH1.wiff2 (sample 6) - PKMF-ESI-P49, -TOF MS (70 - 1500) from 0.162 min, noise filtered (noise multiplier = 1.5), Gaussian smoothed (0.5 points)

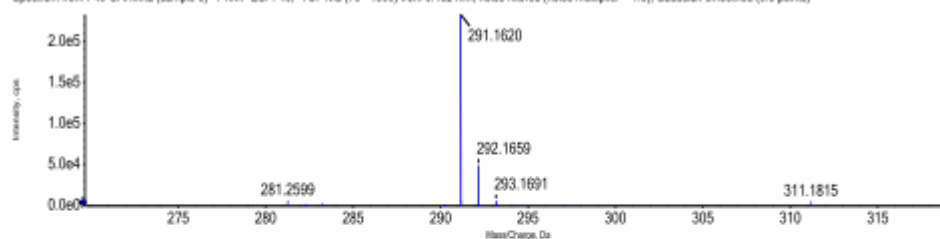

### Molecular formula prediction

3-((4-methylpiperazin-1-yl)methyl)-2-phenyl-1H-indole (4g)

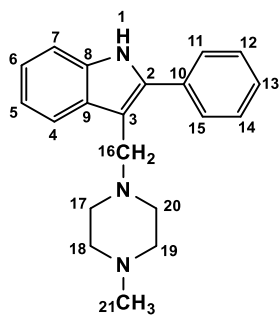

<sup>1</sup>H-NMR:

PKAF-DMSO-1H

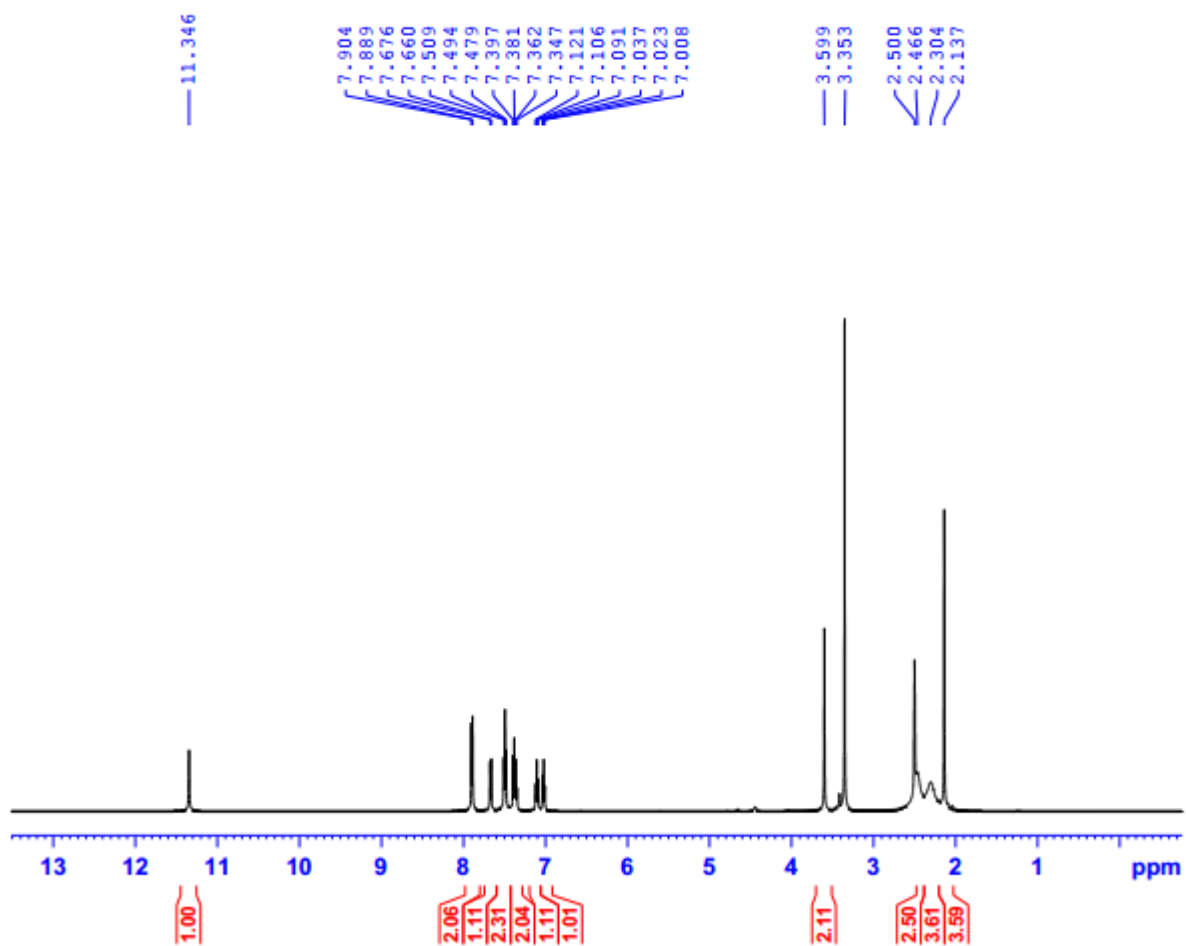

<sup>13</sup>C-NMR:

**PKAF-DMSO-C13CPD**

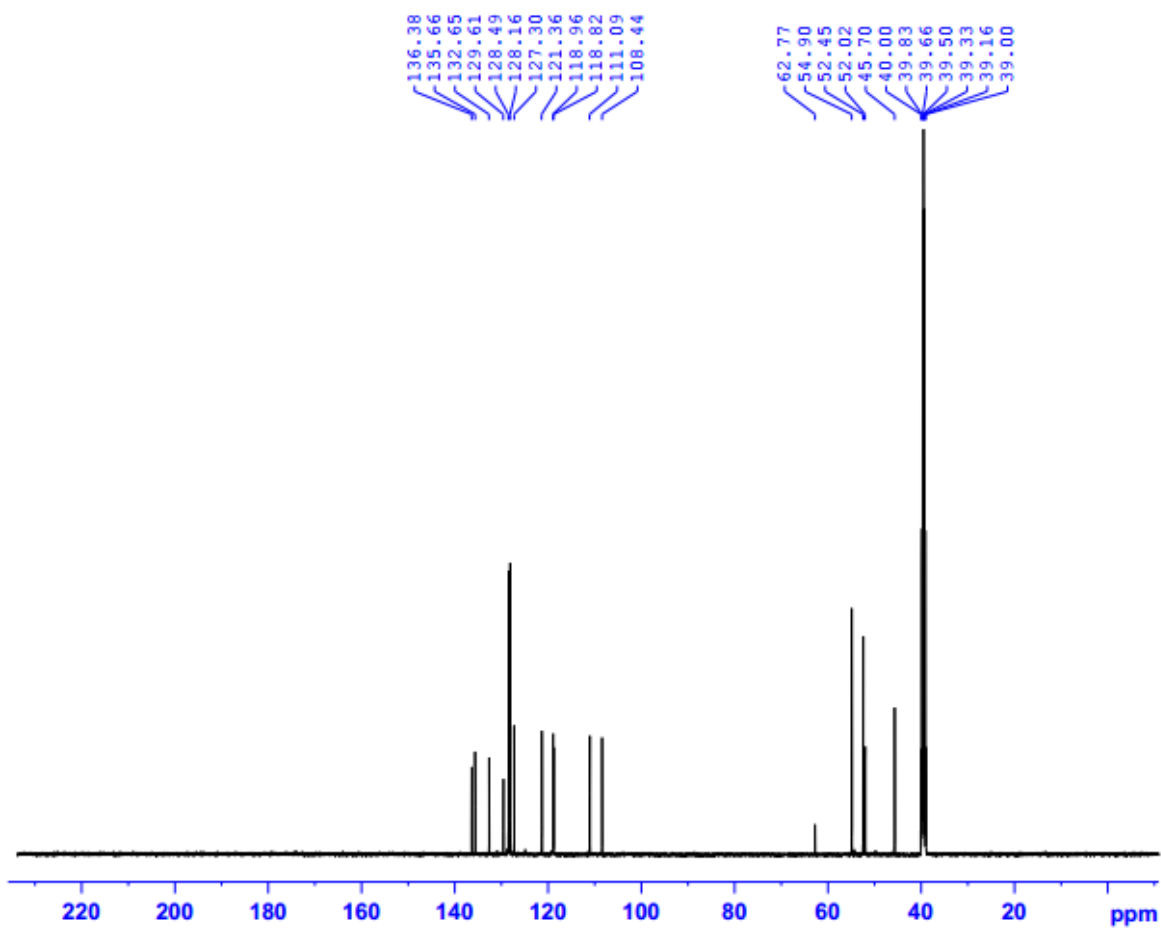

## ESI-HRMS:

### ANALYSIS REPORT

#### Injection details

|                         |                     |                           |              |
|-------------------------|---------------------|---------------------------|--------------|
| <i>Sample name</i>      | PKAF                | <i>Vial position</i>      | 12           |
| <i>Sample file name</i> | SER. wiff2 - CHI    | <i>Inject volume</i>      | 5.00         |
| <i>Acquisition date</i> | 8/1/2019 1:04:54 PM | <i>Acquisition method</i> | ESI_NEG_SCAN |
| <i>Operator</i>         | CB21261708          | <i>Instrument name</i>    | X500R QTOF   |

#### Full mass spectrum

Spectrum from P49-CHI.wiff2 (sample 3) - PKAF-ESI-P49, -TOF MS (70 - 1500) from 0.153 min, noise filtered (noise multiplier = 1.5), Gaussian smoothed (0.5 points)

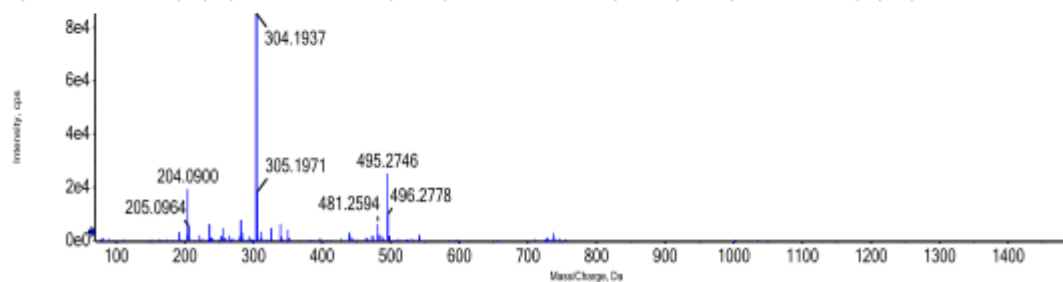

#### Expanded spectrum

Spectrum from P49-CHI.wiff2 (sample 3) - PKAF-ESI-P49, -TOF MS (70 - 1500) from 0.153 min, noise filtered (noise multiplier = 1.5), Gaussian smoothed (0.5 points)

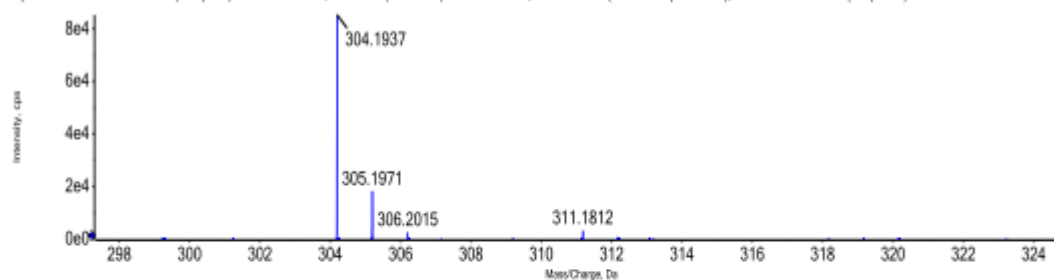

#### Molecular formula prediction

*3-[(4-Methoxy-phenyl)-pyrrolidin-1-yl-methyl]-1H-indole-2-carboxylic acid (5a)*

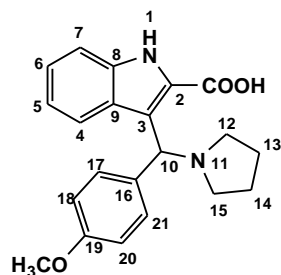

<sup>1</sup>H-NMR:

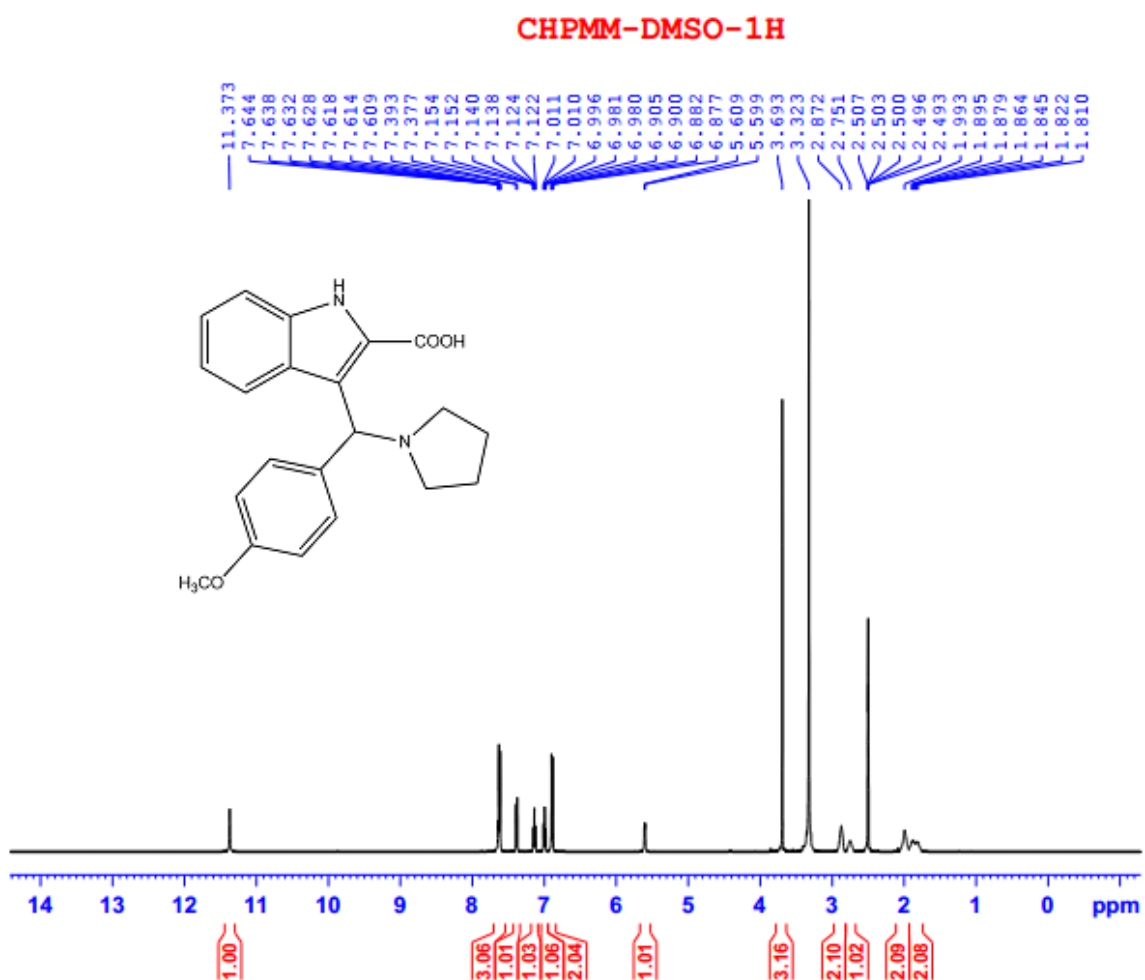

<sup>13</sup>C-NMR:

CHPMM-DMSO-C13CPD

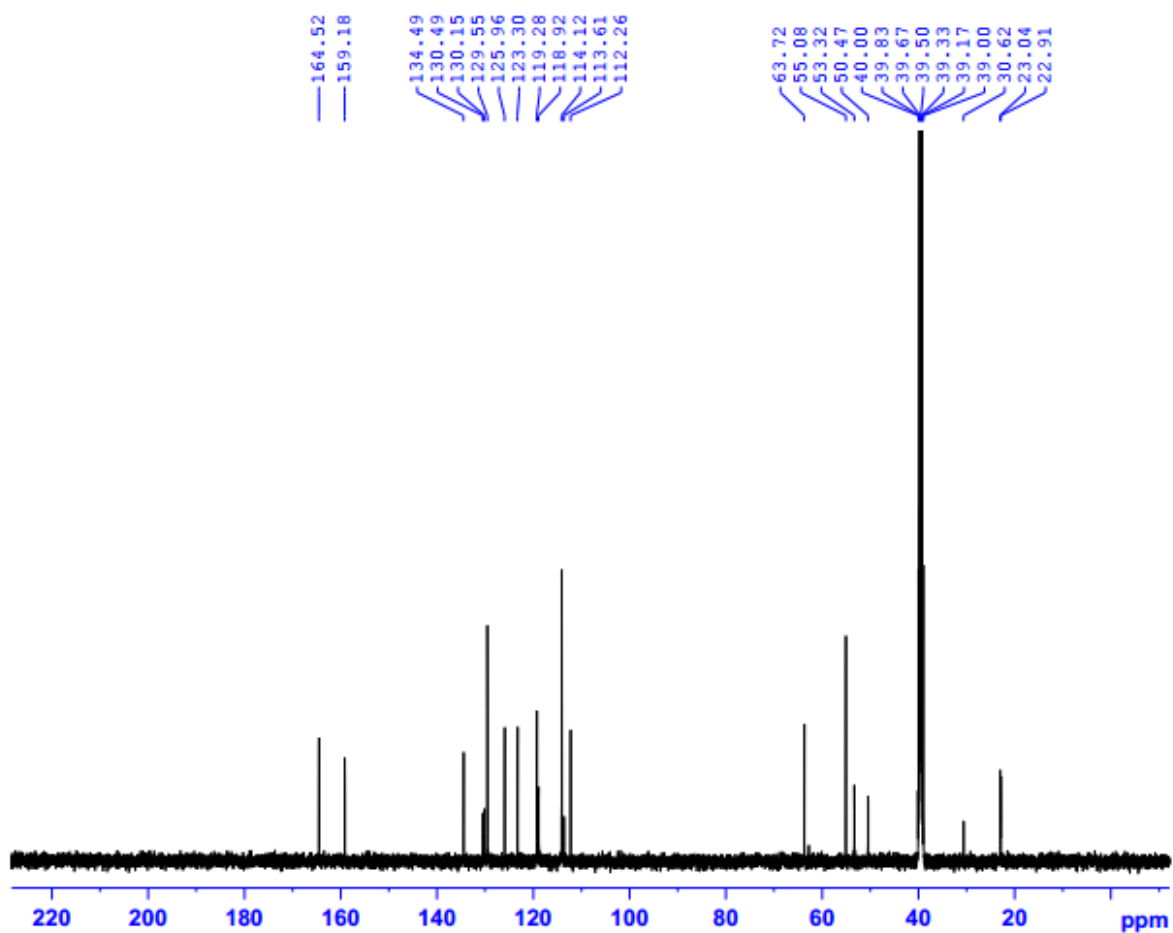

# ESI-HRMS:

## ANALYSIS REPORT

### Injection details

|                         |                       |                           |              |
|-------------------------|-----------------------|---------------------------|--------------|
| <i>Sample name</i>      | CHPMM                 | <i>Vial position</i>      | 30           |
| <i>Sample file name</i> | SER. wif2-CHI         | <i>Inject volume</i>      | 5.00         |
| <i>Acquisition date</i> | 06/05/2019 1:04:54 PM | <i>Acquisition method</i> | ESI_NEG_SCAN |
| <i>Operator</i>         | CB21261708            | <i>Instrument name</i>    | X500R QTOF   |

### Full mass spectrum

Spectrum from P49-CHI.wif2 (sample 11) - CHPMM-ESI-P49, -TOF MS (70 - 1500) from 0.157 min, noise filtered (noise multiplier = 1.5), Gaussian smoothed (0.5 points)

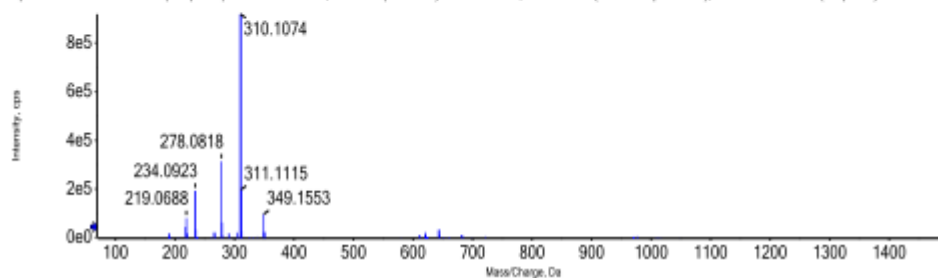

### Expanded spectrum

Spectrum from P49-CHI.wif2 (sample 11) - CHPMM-ESI-P49, -TOF MS (70 - 1500) from 0.157 min, noise filtered (noise multiplier = 1.5), Gaussian smoothed (0.5 points)

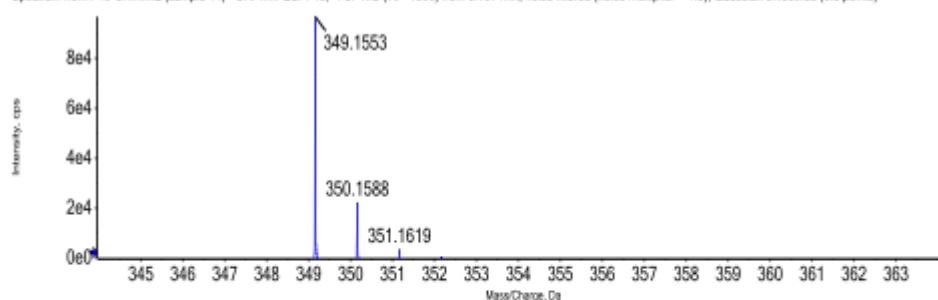

### Molecular formula prediction



3-[(4-Methoxy-phenyl)-morpholin-4-yl-methyl]-1H-indole-2-carboxylic acid (**5b**)

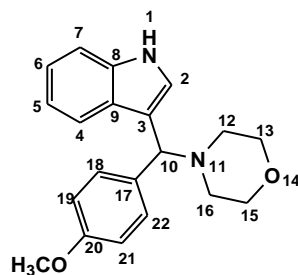

<sup>1</sup>H-NMR:

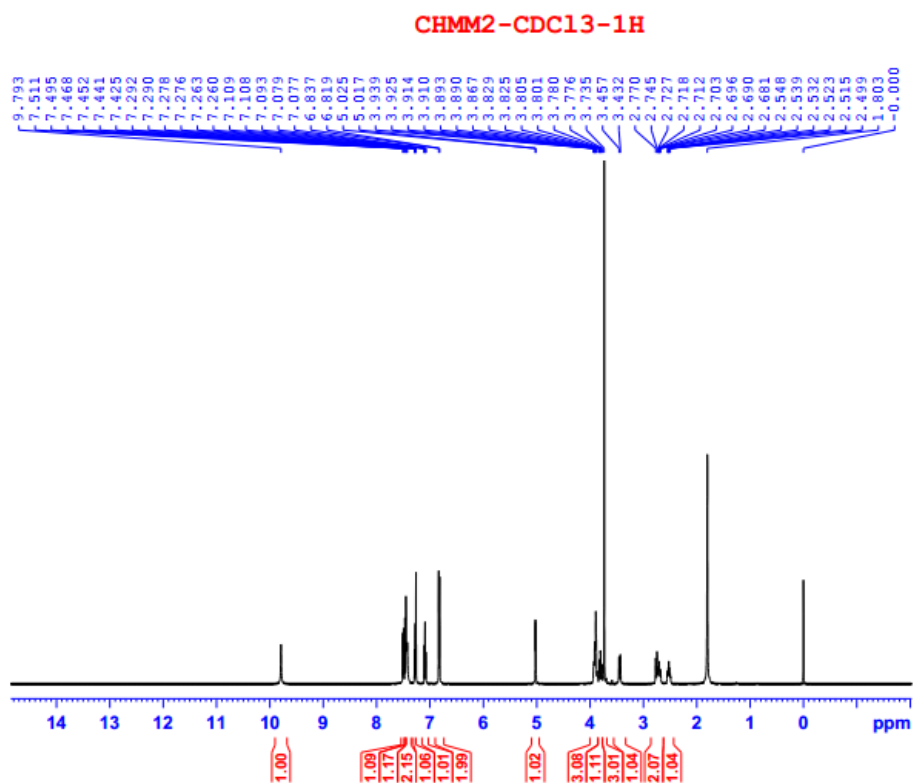

<sup>13</sup>C-NMR:

CHMM2-CDC13-C13CPD

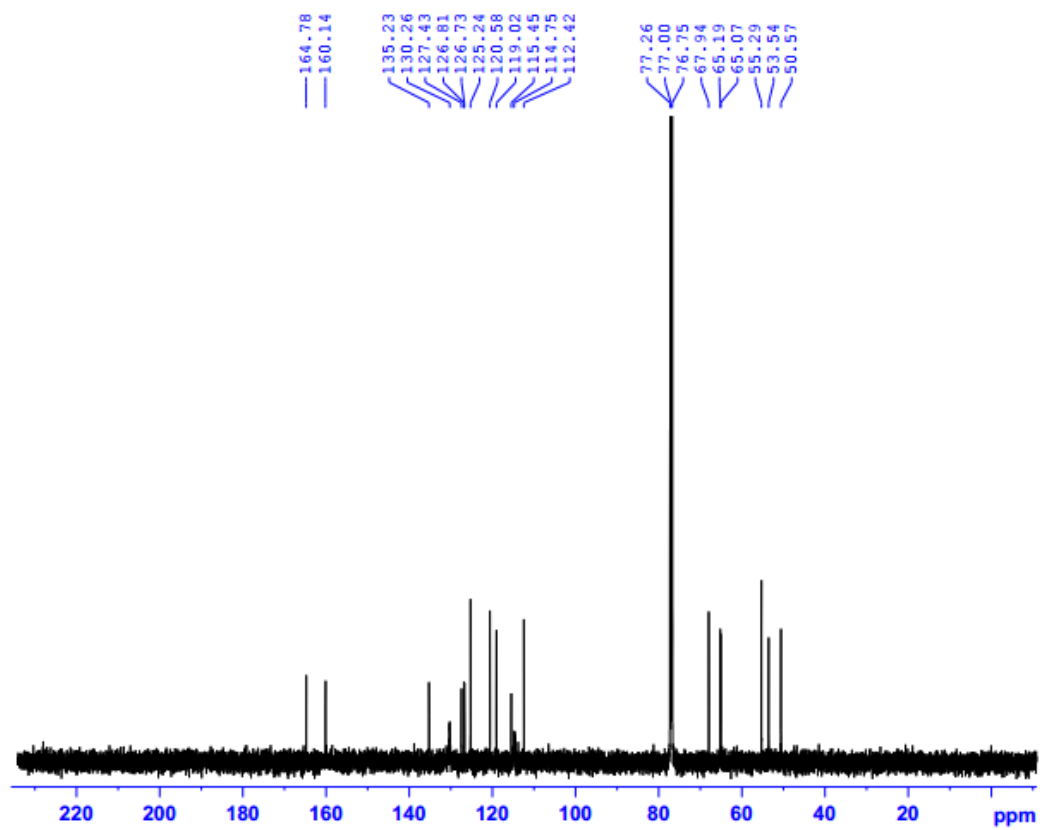

# ESI-HRMS:

## ANALYSIS REPORT

### Injection details

|                  |                       |                    |              |
|------------------|-----------------------|--------------------|--------------|
| Sample name      | CHMMM                 | Vial position      | 2            |
| Sample file name | SER. wiff2-CHI        | Inject volume      | 5.00         |
| Acquisition date | 16/04/2019 1:04:54 PM | Acquisition method | ESI_NEG_SCAN |
| Operator         | CB21261708            | Instrument name    | X500R QTOF   |

### Full mass spectrum

Spectrum from CHMM-ESLwif2 (sample 1) - CHMM-ESI, -TOF MS (70 - 1500) from 0.194 min, noise filtered (noise multiplier = 1.5), Gaussian smoothed (0.5 points)

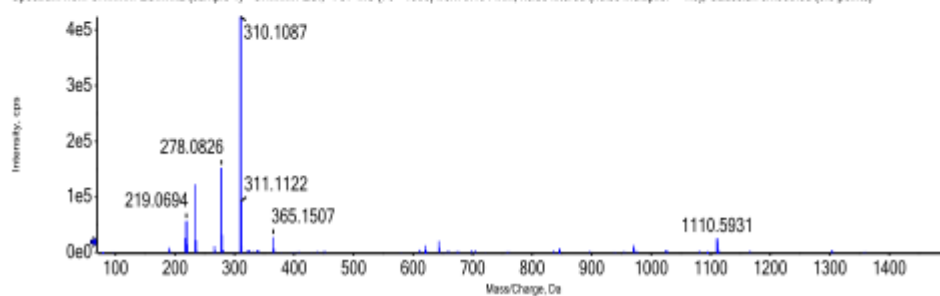

### Expanded spectrum

Spectrum from CHMM-ESLwif2 (sample 1) - CHMM-ESI, -TOF MS (70 - 1500) from 0.194 min, noise filtered (noise multiplier = 1.5), Gaussian smoothed (0.5 points)

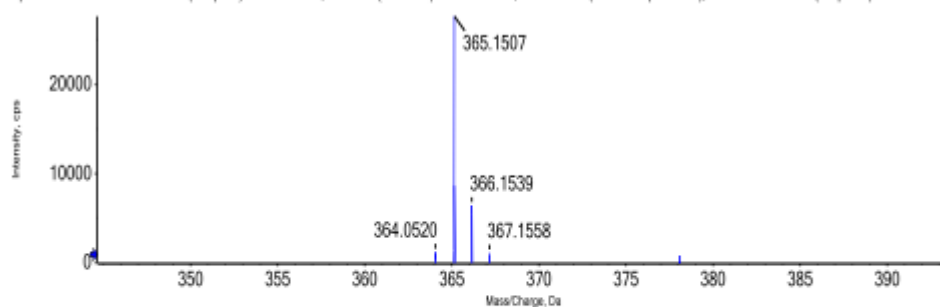

### Molecular formula prediction

3-[(4-Methoxy-phenyl)-piperidin-1-yl-methyl]-1H-indole-2-carboxylic acid (**5c**)

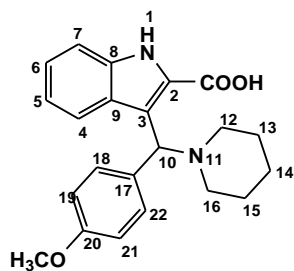

<sup>1</sup>H-NMR:

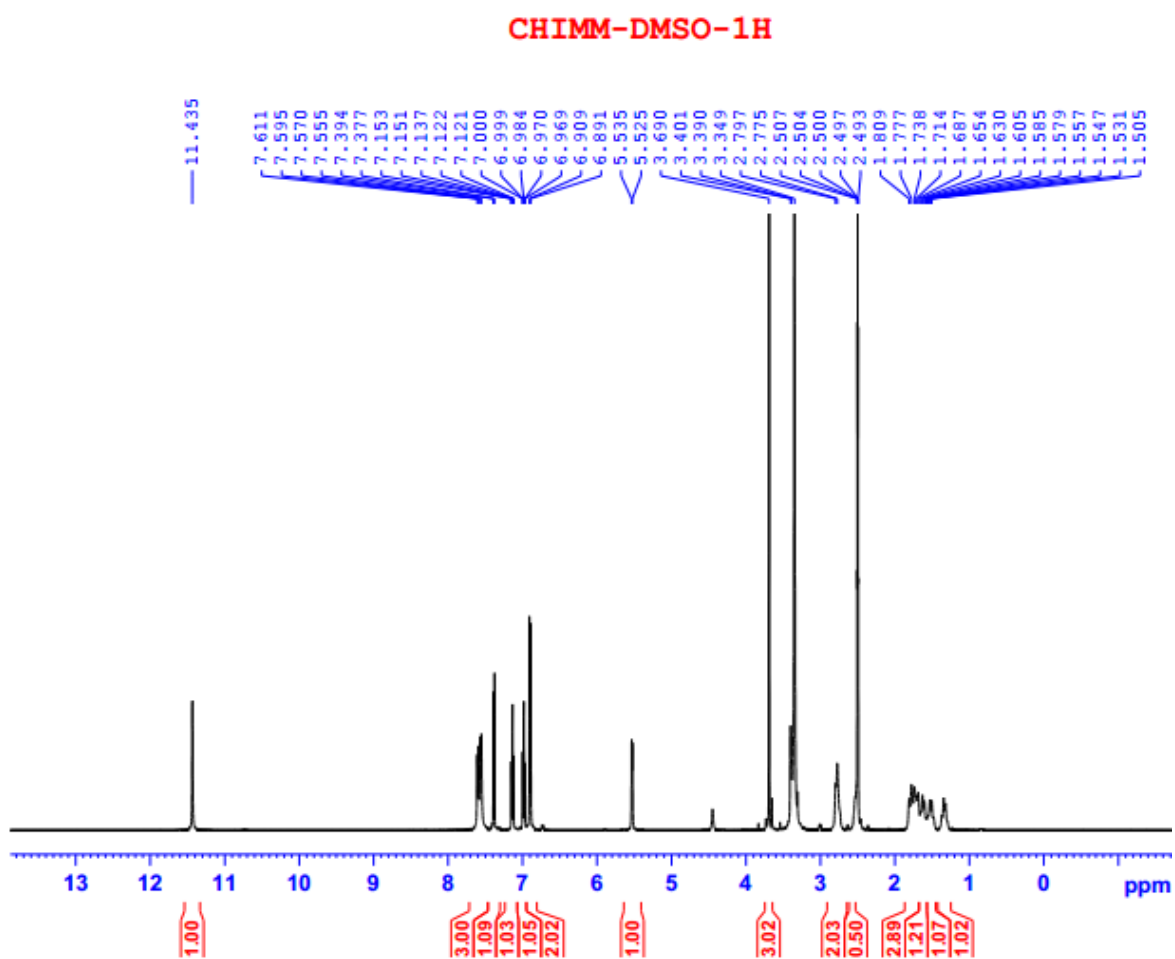

<sup>13</sup>C-NMR:

CHIMM-DMSO-C13CPD

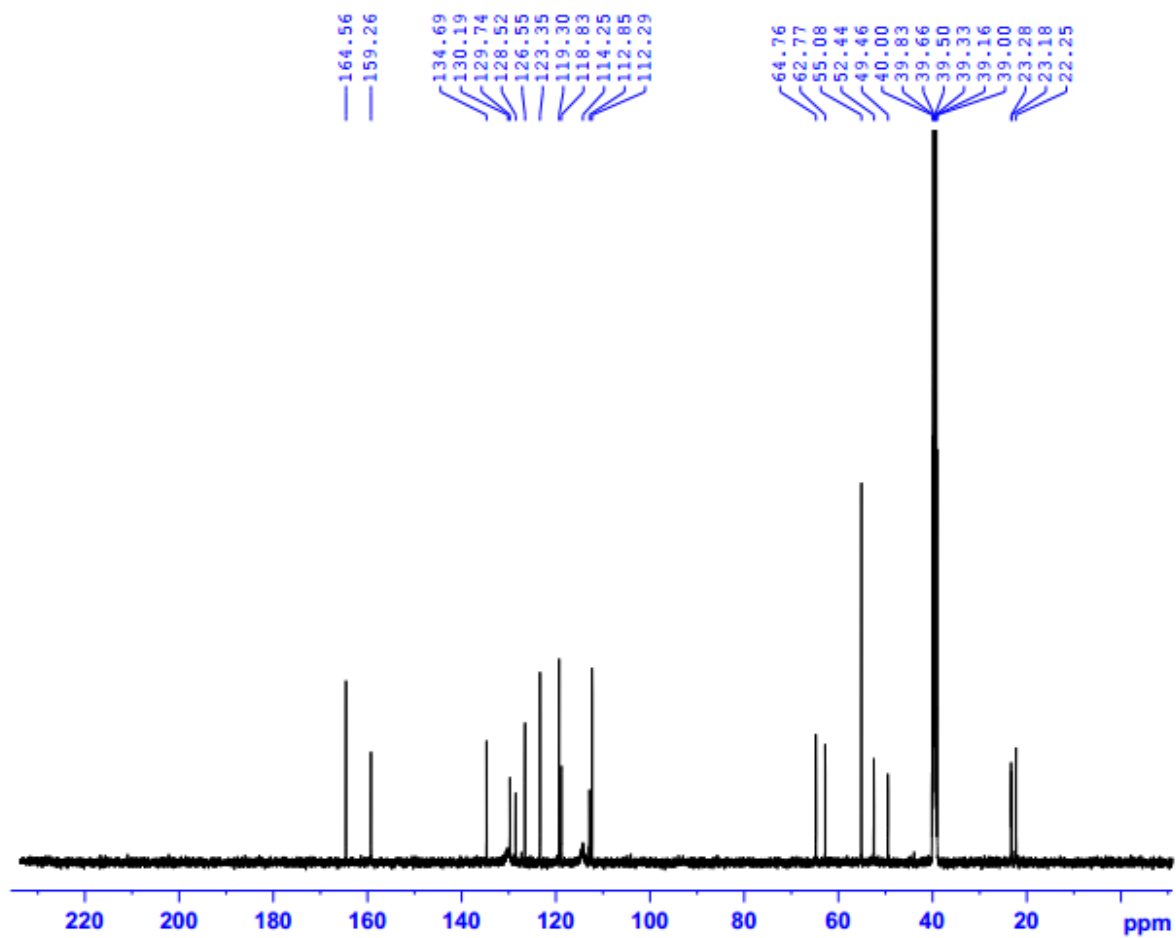

# ESI-HRMS:

## ANALYSIS REPORT

### Injection details

|                  |                       |                    |              |
|------------------|-----------------------|--------------------|--------------|
| Sample name      | CHIMM                 | Vial position      | 41           |
| Sample file name | SER. wiff2-CHI        | Inject volume      | 5.00         |
| Acquisition date | 06/05/2019 1:04:54 PM | Acquisition method | ESI_NEG_SCAN |
| Operator         | CB21261708            | Instrument name    | X500R QTOF   |

### Full mass spectrum

Spectrum from CHIM+ESI-CHI.wiff2 (sample 1) - CHIM+ESI-CHI, +TOF MS (70 - 1500) from 0.185 min, noise filtered (noise multiplier = 1.5), Gaussian smoothed (0.5 points)

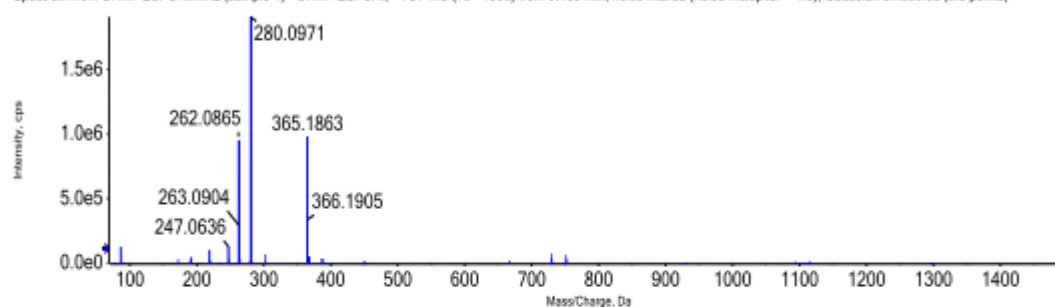

### Expanded spectrum

Spectrum from CHIM+ESI-CHI.wiff2 (sample 1) - CHIM+ESI-CHI, +TOF MS (70 - 1500) from 0.185 min, noise filtered (noise multiplier = 1.5), Gaussian smoothed (0.5 points)

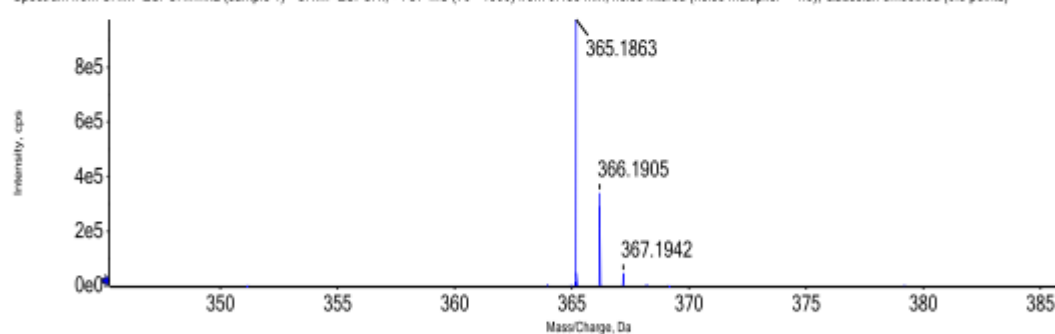

### Molecular formula prediction

3-[(4-Methoxy-phenyl)-pyrrolidin-1-yl-methyl]-2-phenyl-1H-indole  
(5d)

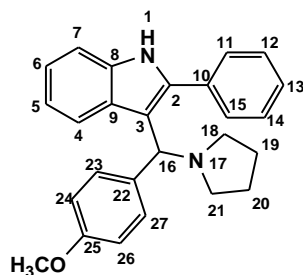

<sup>1</sup>H-NMR:

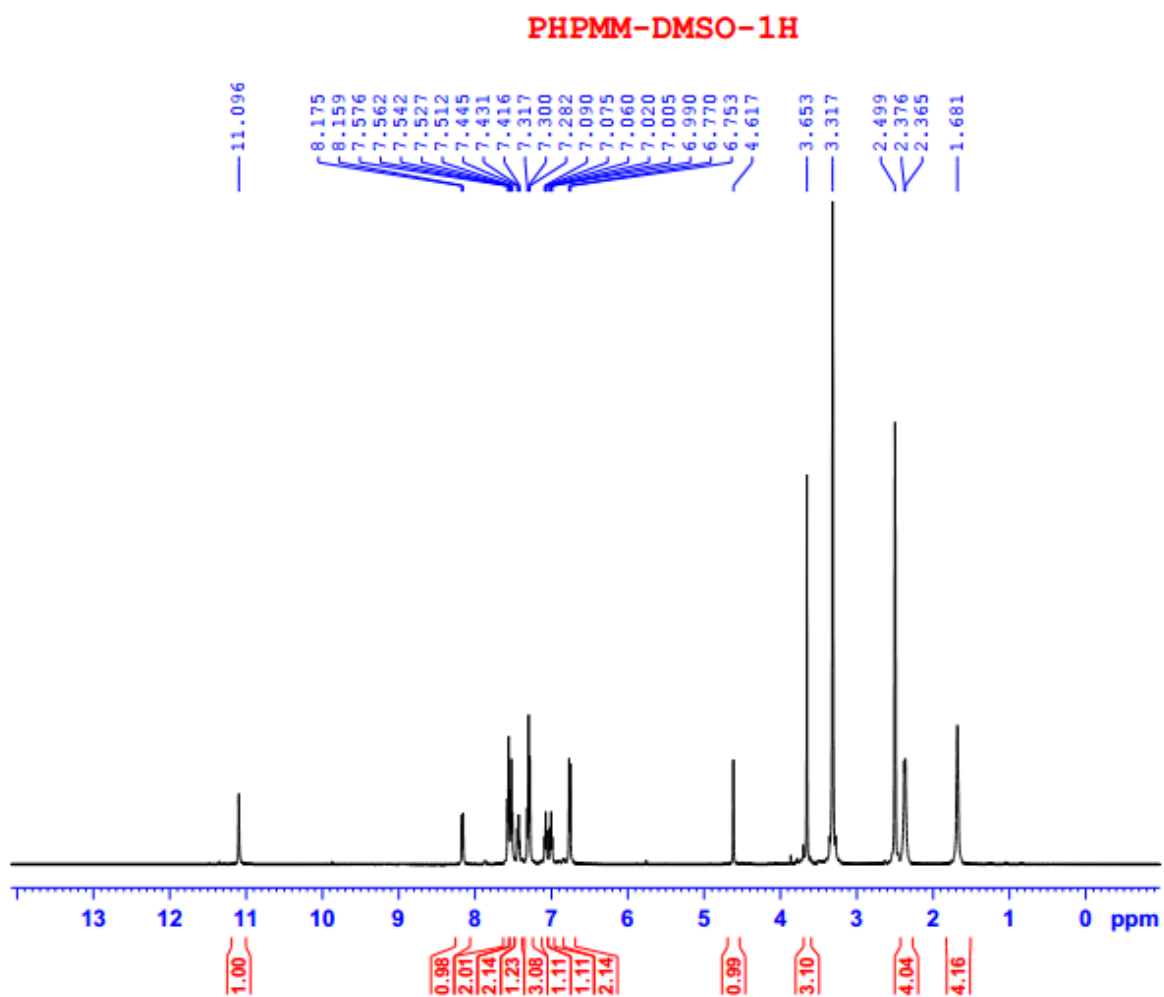

<sup>13</sup>C-NMR:

PHPMM-DMSO-C13CPD

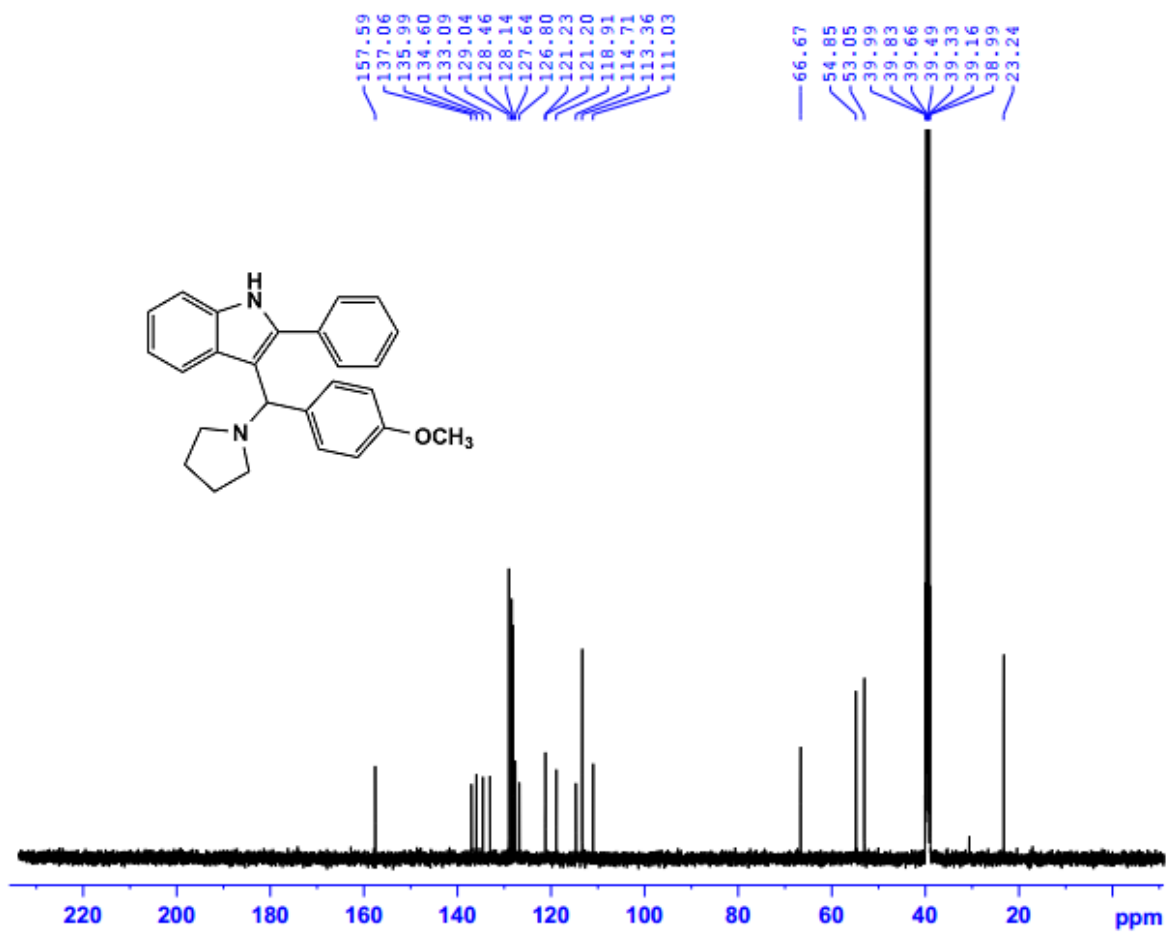



# ESI-HRMS:

## ANALYSIS REPORT

### Injection details

|                  |                       |                    |              |
|------------------|-----------------------|--------------------|--------------|
| Sample name      | PHPMM                 | Vial position      | 1            |
| Sample file name | SER. wiff2-CHI        | Inject volume      | 5.00         |
| Acquisition date | 16/04/2019 1:04:54 PM | Acquisition method | ESI_POS_SCAN |
| Operator         | CB21261708            | Instrument name    | X500R QTOF   |

### Full mass spectrum

Spectrum from PHPMM+ESI-CHI.wiff2 (sample 1) - PHPMM+ESI-CHI, +TOF MS (70 - 1500) from 0.167 min, noise filtered (noise multiplier = 1.5), Gaussian smoothed (0.5 points)

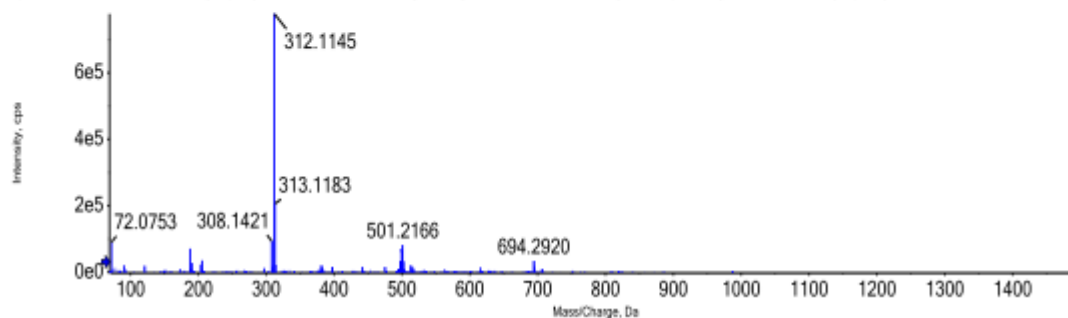

### Expanded spectrum

Spectrum from PHPMM+ESI-CHI.wiff2 (sample 1) - PHPMM+ESI-CHI, +TOF MS (70 - 1500) from 0.167 min, noise filtered (noise multiplier = 1.5), Gaussian smoothed (0.5 points)

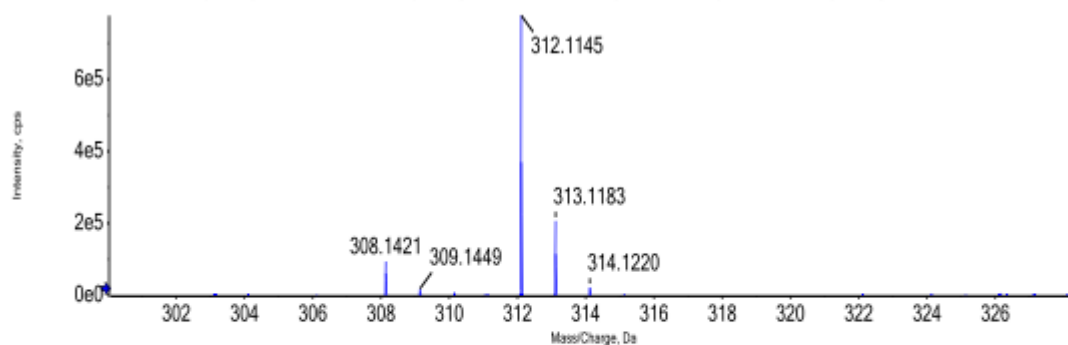

### Molecular formula prediction

3-[(4-Methoxy-phenyl)-pyrrolidin-1-yl-methyl]-1H-indole (5e)

<sup>1</sup>H-NMR:

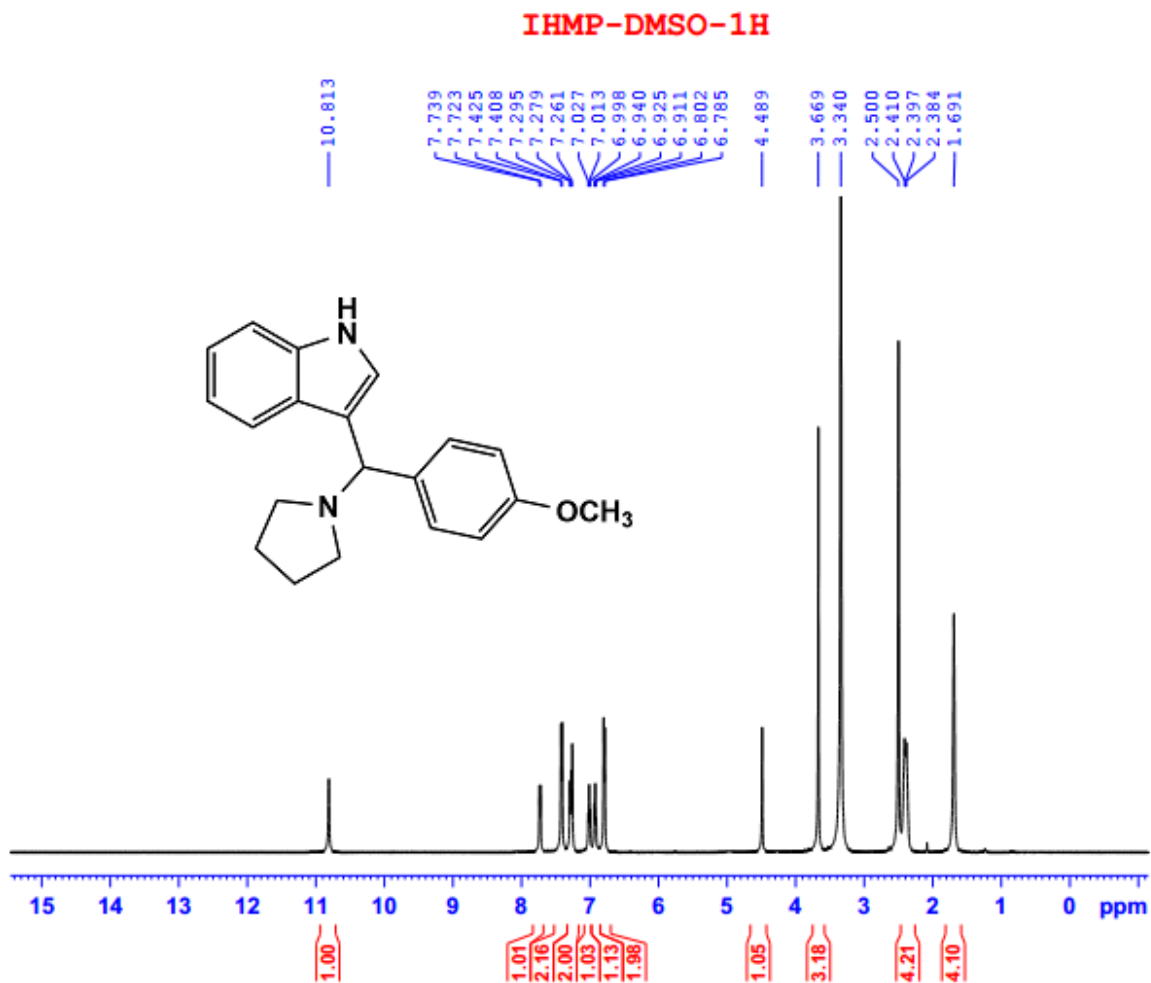

<sup>13</sup>C-NMR:

IHMP-DMSO-C13CPD

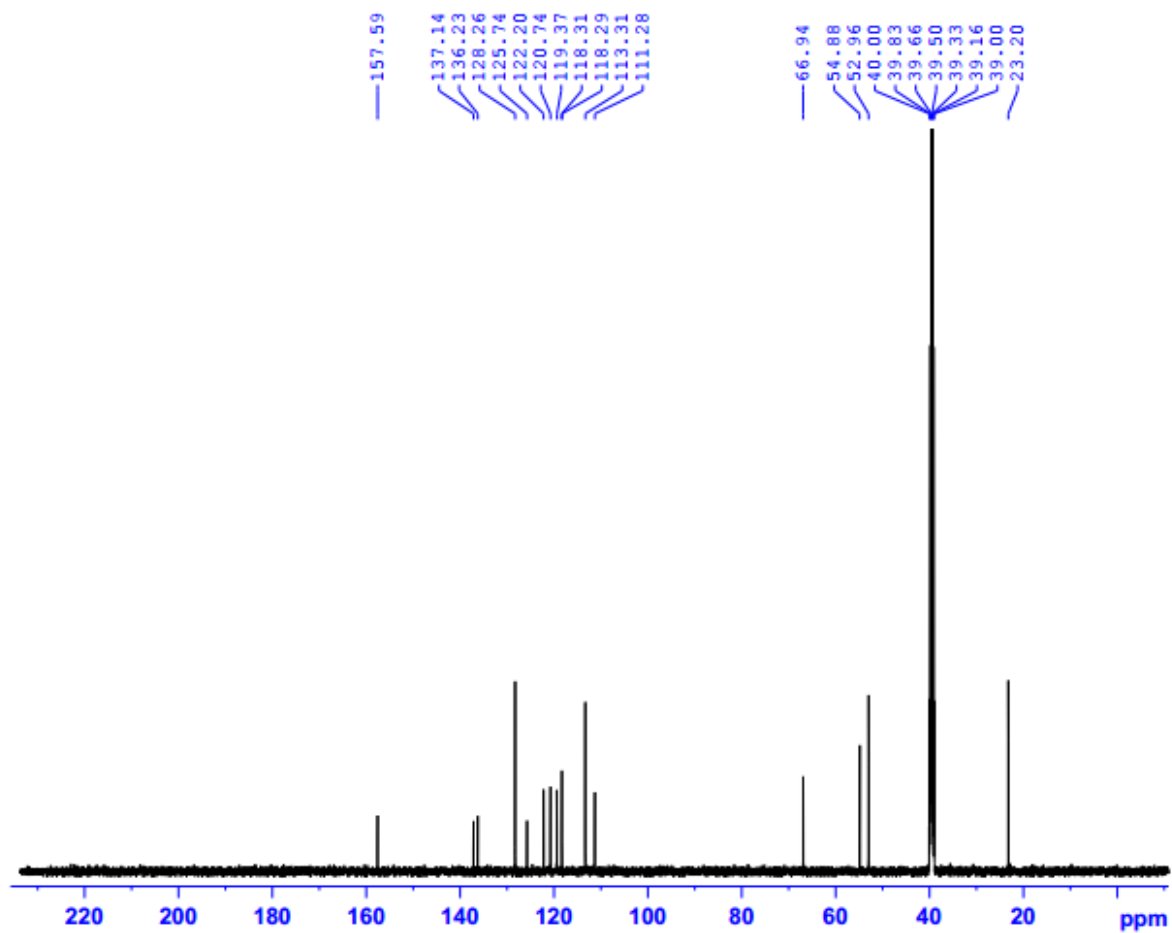

## ESI-HRMS:

### ANALYSIS REPORT

#### Injection details

|                         |                       |                           |              |
|-------------------------|-----------------------|---------------------------|--------------|
| <i>Sample name</i>      | IHPMM                 | <i>Vial position</i>      | 2            |
| <i>Sample file name</i> | SER. wiff2-CHI        | <i>Inject volume</i>      | 5.00         |
| <i>Acquisition date</i> | 16/04/2019 1:04:54 PM | <i>Acquisition method</i> | ESI_POS_SCAN |
| <i>Operator</i>         | CB21261708            | <i>Instrument name</i>    | X500R_QTOF   |

#### Full mass spectrum

Spectrum from IHPMM-ESI-CHI.wiff2 (sample 1) - IHPMM-ESI-CHI, +TOF MS (70 - 1500) from 0.171 min, noise filtered (noise multiplier = 1.5), Gaussian smoothed (0.5 points)

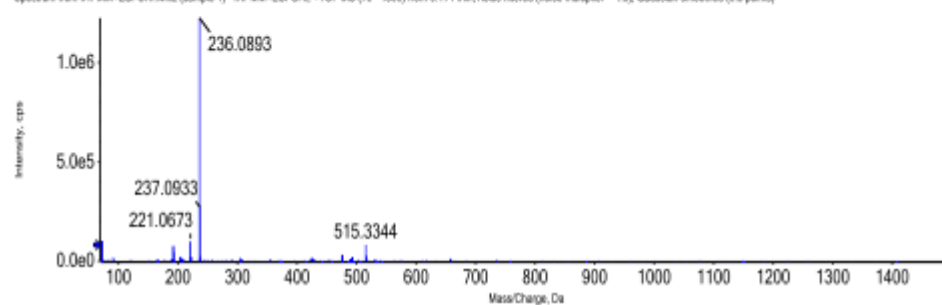

#### Expanded spectrum

Spectrum from IHPMM-ESI-CHI.wiff2 (sample 1) - IHPMM-ESI-CHI, +TOF MS (70 - 1500) from 0.171 min, noise filtered (noise multiplier = 1.5), Gaussian smoothed (0.5 points)

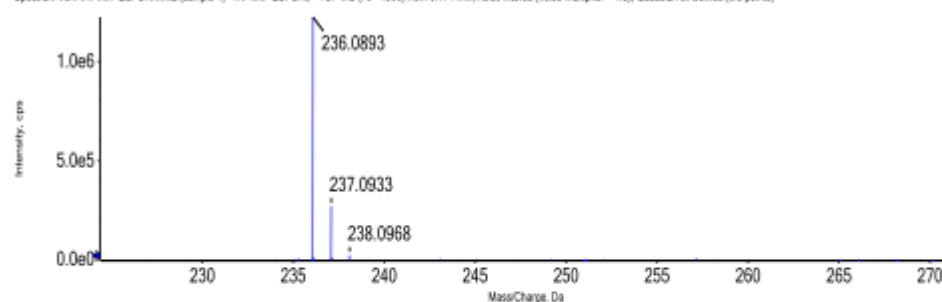

#### Molecular formula prediction

5-Bromo-3-[(4-methoxy-phenyl)-pyrrolidin-1-yl-methyl]-1H-indole  
(5f)

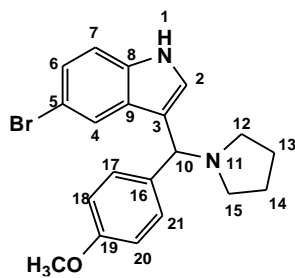

<sup>1</sup>H-NMR:

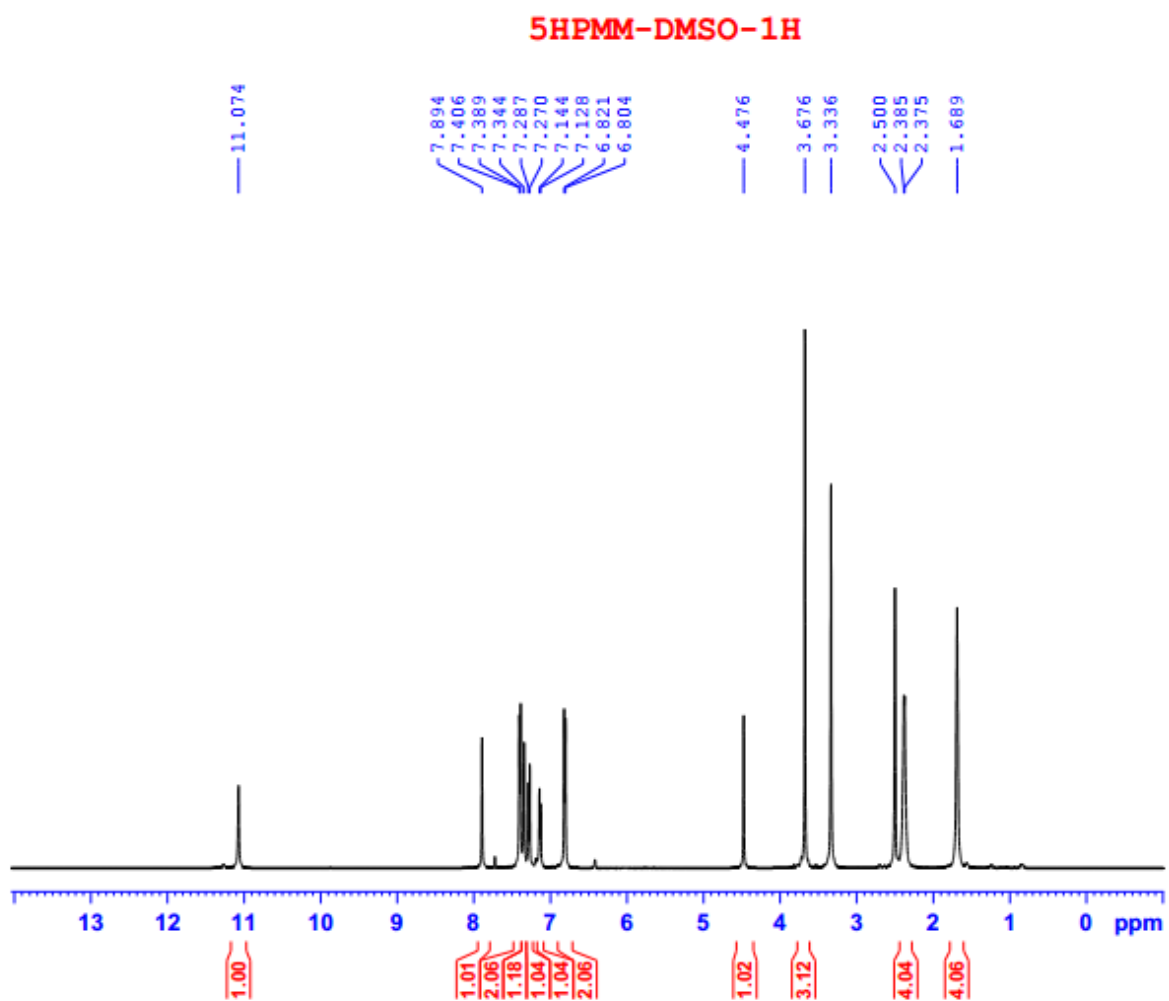

<sup>13</sup>C-NMR:

5HPMM-DMSO-C13CPD

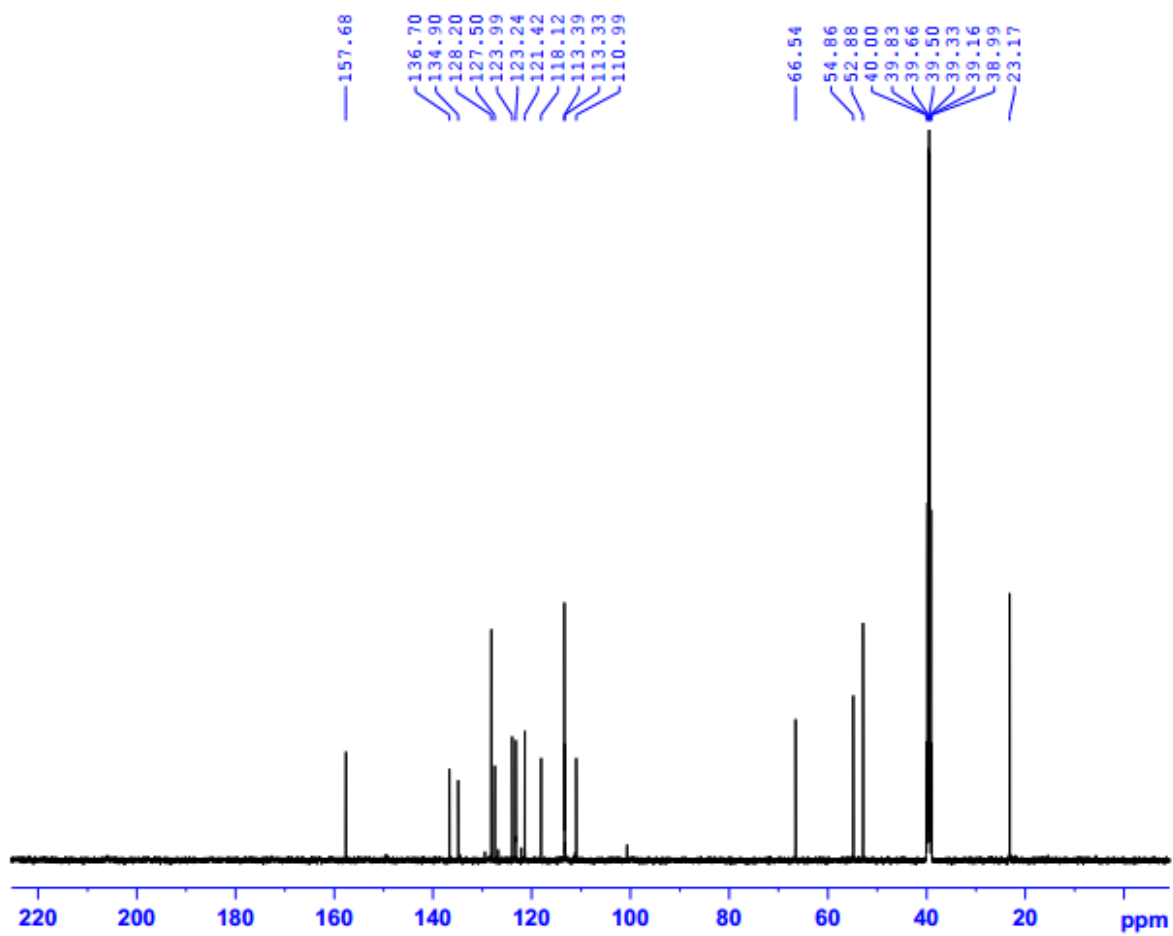

## ESI-HRMS:

### ANALYSIS REPORT

#### Injection details

|                  |                       |                    |              |
|------------------|-----------------------|--------------------|--------------|
| Sample name      | 5HPMM                 | Vial position      | 2            |
| Sample file name | SER_wiff2-CHI         | Inject volume      | 5.00         |
| Acquisition date | 16/04/2019 1:04:54 PM | Acquisition method | ESI_NEG_SCAN |
| Operator         | CB21261708            | Instrument name    | X500R_QTOF   |

#### Full mass spectrum

Spectrum from 5HPMM-ESI.wiff2 (sample 1) - 5HPMM-ESI, -TOF MS (75 - 1500) from 0.148 min, noise filtered (noise multiplier = 1.5), Gaussian smoothed (0.5 points)

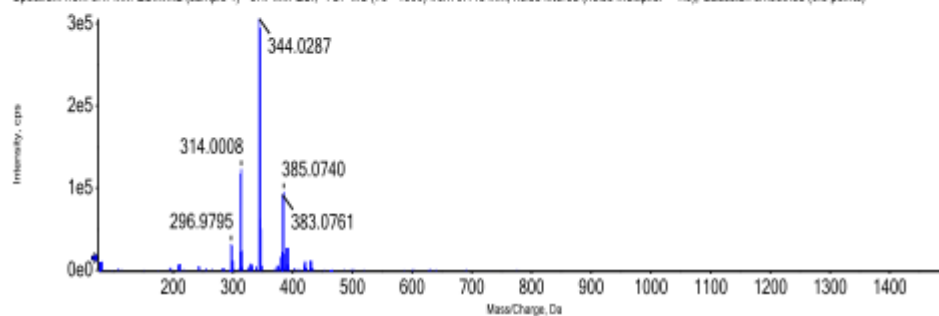

#### Expanded spectrum

Spectrum from 5HPMM-ESI.wiff2 (sample 1) - 5HPMM-ESI, -TOF MS (75 - 1500) from 0.148 min, noise filtered (noise multiplier = 1.5), Gaussian smoothed (0.5 points)

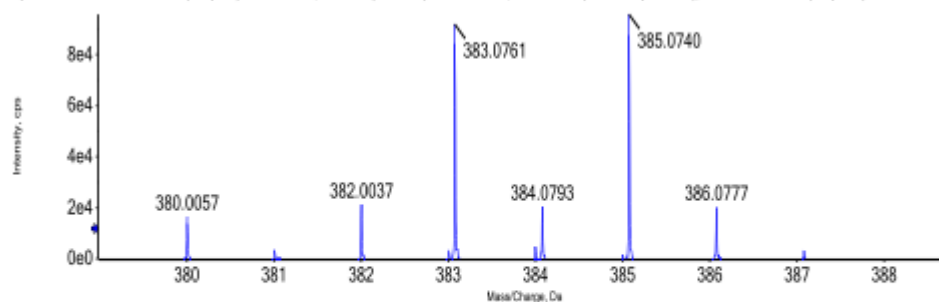

#### Molecular formula prediction

5-bromo-3-((4-chlorophenyl)pyrrolidin-1-yl)methyl)-1H-indole (5g)

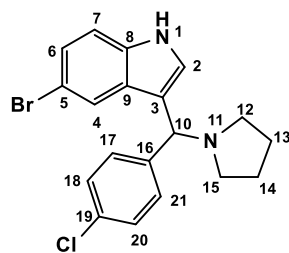

<sup>1</sup>H-NMR:

5HP4C-DMSO-1H

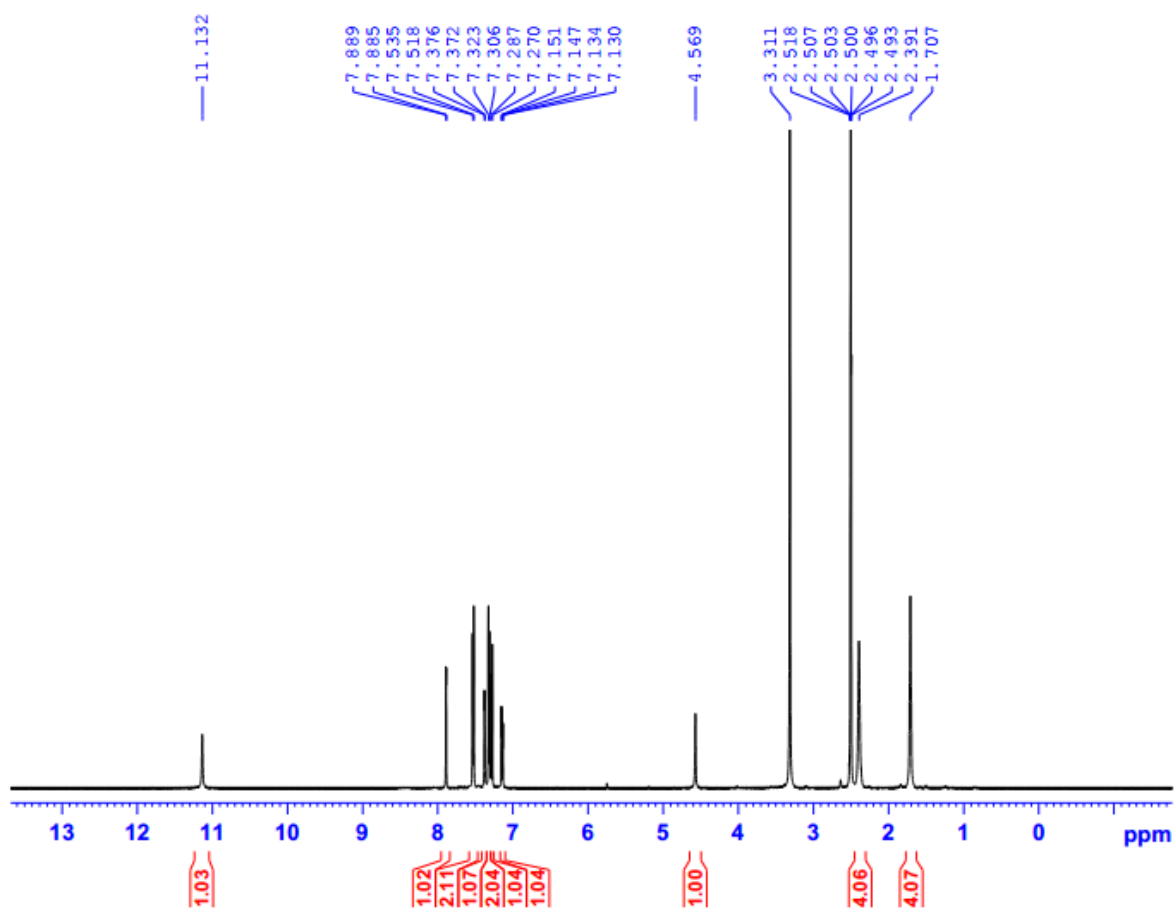



<sup>13</sup>C-NMR:

**5HP4C-DMSO-C13CPD**

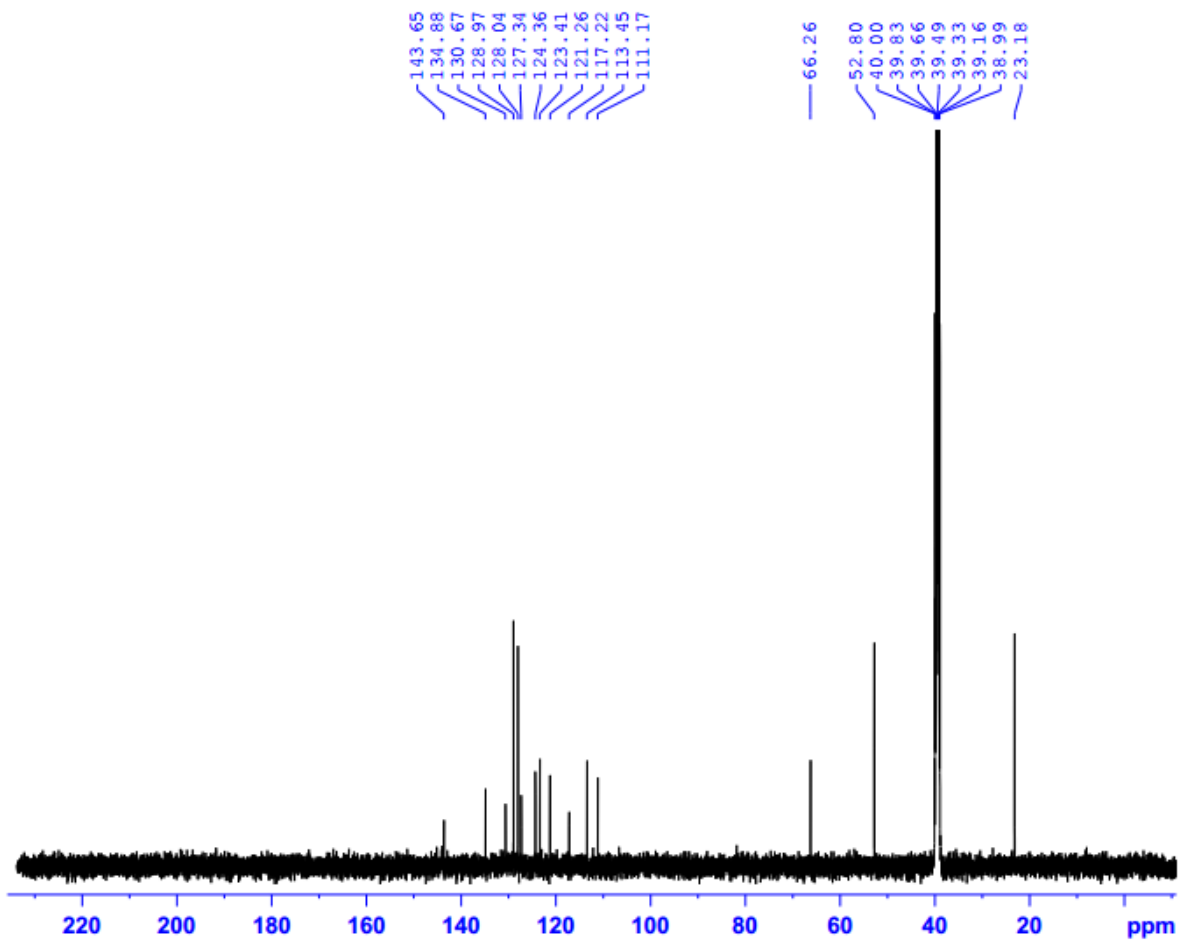

# ESI-HRMS:

## Qualitative Analysis Report

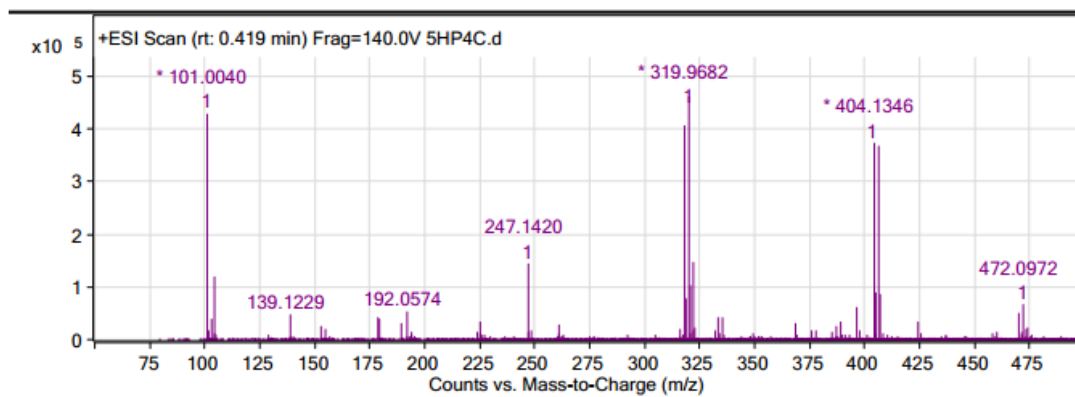

### Peak List

| <i>m/z</i> | <i>z</i> | Abund     |
|------------|----------|-----------|
| 101.004    | 1        | 428150.19 |
| 104.1071   | 1        | 119625.32 |
| 247.142    | 1        | 143351.88 |
| 317.9694   | 1        | 404799.63 |
| 319.9682   | 1        | 461342.06 |
| 320.969    | 1        | 103575.79 |
| 321.9639   | 1        | 146784.94 |
| 404.1346   | 1        | 373142.69 |
| 405.1365   | 1        | 88963.96  |
| 406.1328   | 1        | 367329.38 |

--- End Of Report ---
